1 **STING recruits NLRP3 to the ER and deubiquitinates NLRP3 to activate the inflammasome**

2

3 Wenbiao Wang<sup>1</sup>, Dingwen Hu<sup>2</sup>, Yuqian Feng<sup>1</sup>, Caifeng Wu<sup>1</sup>, Aixin Li<sup>2</sup>, Yingchong Wang<sup>2</sup>, Keli  
4 Cheng<sup>2</sup>, Mingfu Tian<sup>2</sup>, Feng Xiao<sup>2</sup>, Qi Zhang<sup>2</sup>, Muhammad Adnan Shereen<sup>2</sup>, Weijie Chen<sup>1</sup>, Pan  
5 Pan<sup>1</sup>, Pin Wan<sup>1</sup>, Weiyong Liu<sup>2</sup>, Fang Liu<sup>2</sup>, Kailang Wu<sup>2</sup>, Geng Li<sup>1</sup>, Yingle Liu<sup>1,2</sup>, and Jianguo Wu<sup>1,2\*</sup>

6 <sup>1</sup>Guangzhou Key Laboratory of Virology, Institute of Medical Microbiology, Jinan University,

7 Guangzhou 510632, China. <sup>2</sup>State Key Laboratory of Virology, College of Life Sciences, Wuhan

8 University, Wuhan 430072, China.

9

10 **\*Correspondence:** Jianguo Wu, State Key Laboratory of Virology and College of Life Sciences,

11 Wuhan University, Wuhan 430072, P.R. China, Tel.: +86-27-68754979, Fax: +86-27-68754592,

12 Email: [jwu@whu.edu.cn](mailto:jwu@whu.edu.cn)

13

14

15

16

17 **Running title:** STING activates the NLRP3 inflammasome

18

19

20 **Abstract**

21

22 One of the fundamental reactions of the innate immune responses to pathogen infection is the  
23 release of pro-inflammatory cytokines, including IL-1 $\beta$ , processed by the NLRP3 inflammasome.  
24 STING is essential for innate immune responses and inflammasome activation. Here we reveal a  
25 distinct mechanism by which STING regulates the NLRP3 inflammasome activation, IL-1 $\beta$   
26 secretion, and inflammatory responses in human cell lines, mice primary cells, and mice.  
27 Interestingly, upon HSV-1 infection and cytosolic DNA stimulation, STING binds to NLRP3 and  
28 promotes the inflammasome activation through two approaches. First, STING recruits NLRP3 and  
29 promotes NLRP3 translocation to the endoplasmic reticulum, thereby facilitating the inflammasome  
30 formation. Second, STING interacts with NLRP3 and removes K48- and K63-linked  
31 polyubiquitination of NLRP3, thereby promoting the inflammasome activation. Collectively, we  
32 demonstrate that the cGAS-STING-NLRP3 signaling is essential for host defense against DNA  
33 virus infection.

34

35 **Keywords:** Cyclic GMP-AMP synthase (cGAS)/Herpes simplex virus type 1

36 (HSV-1)/Interleukine-1 $\beta$  (IL-1 $\beta$ )/Polyubiquitination and deubiquitination/The cGAS-STING

37 pathway

38

## 39 **Introduction**

40

41 The innate immune system detecting pathogens through recognition of molecular patterns is a  
42 primary host defense strategy to suppress the infections (Akira et al, 2006). Recognition of  
43 pathogens stimuli, known as pathogen-associate molecular patterns (PAMPS), is relied on pattern  
44 recognition receptors (PRRs). Several families of PRRs have been described, including the Toll-like  
45 receptor (TLR) (Takeuchi & Akira, 2010), RIG-I-like receptor (RLR) (Yoneyama et al., 2004),  
46 NOD-like receptor (NLR) (Ting et al, 2008), and C-type lectin receptor (CLR) (Hardison & Brown,  
47 2012). The NLRs involved in the assembly of large protein complexes referred to as  
48 inflammasomes are emerging as a major route by which the innate immune system responds to  
49 pathogen infections (Schroder & Tschopp, 2010). One of the fundamental reactions of the innate  
50 immunity is the procession and release of pro-inflammatory cytokines, including interleukine-1 $\beta$   
51 (IL-1 $\beta$ ), a pleiotropic cytokine playing crucial roles in inflammatory responses in addition to  
52 instructing immune responses (Dinarello, 2009). The best-characterized inflammasomes is the  
53 NLRP3 inflammasome, which consists of three major components: a cytoplasmic sensor NLRP3  
54 (NACHT, LRR and PYD domains-containing protein 3), an adaptor ASC (apoptosis-associated  
55 speck-like protein with CARD domain), and an interleukin-1 $\beta$ -converting enzyme pro-Caspase-1  
56 (cysteinylnl aspartate-specific proteinase-1) (Schroder & Tschopp, 2010). NLRP3 and ASC together  
57 promote the cleavage of pro-Casp-1 to generate active subunits p20 and p10, which regulate IL-1 $\beta$   
58 maturation (Martinon et al, 2004).

59 The stimulator of interferon genes (STING) has the essential roles in innate immune response  
60 against pathogen infections (Ishikawa et al, 2009). Upon binding of cytoplasmic DNA, cyclic

61 GMP-AMP synthase (cGAS) catalyzes the formation of cyclic guanosine monophosphate-adenosine  
62 monophosphate (cGAMP) by binding to STING. STING subsequently co-localizes with TBK1 and  
63 IRF3, leading to induction of type I IFNs, and recruits TRAF6 and TBK1 or TRAF3 and IKK $\alpha$  to  
64 activate the NF- $\kappa$ B pathway (Abe & Barber, 2014; Wu et al., 2013). In human myeloid cells,  
65 STING is involved in cytosolic DNA induced-NLRP3 inflammasome activation (Gaidt et al, 2017),  
66 and in mice BMDMs, STING is required for pathogen-induced inflammasome activation and IL-1 $\beta$   
67 secretion (Webster et al., 2017; Swanson et al., 2017).

68 We explored how STING regulates the NLRP3 inflammasome and reveal a distinct mechanism  
69 underlying such regulation upon herpes simplex virus type 1 (HSV-1) infection and cytosolic DNA  
70 stimulation. HSV-1 causes various mild clinical symptoms, while in immunocompromized and  
71 neonates individuals, it can cause herpes simplex encephalitis, which may lead to death or result in  
72 some neurological problems (Roizman, 2013). But the detailed mechanisms by which HSV-1  
73 regulates the NLRP3 inflammasome are largely unknown. We demonstrate that HSV-1-induced  
74 NLRP3 inflammasome activation is dependent on the cGAS-cGAMP-STING pathway. STING  
75 recruits and promotes NLRP3 translocation to the endoplasmic reticulum, and binds and removes  
76 NLRP3 polyubiquitination, thereby promoting the inflammasome activation. We propose that the  
77 cGAS-cGAMP-STING-NLRP3 axis is essential for host defense against DNA virus infection.

78

79 **Results**

80

81 **STING interacts with NLRP3 to facilitate the inflammasome activation.**

82 We initially determined the correlation between STING and NLRP3, and showed that STING and  
83 NLRP3 interacted with each other in human embryonic kidney (HEK293T) cells (Fig 1A, B). The  
84 NLRP3 inflammasome consists of three major components, NLRP3, ASC, and pro-Casp-1  
85 (Schroder & Tschopp, 2010). We explored whether STING interacts with ASC and/or pro-Casp-1,  
86 and clearly revealed that STING interacted with NLRP3, but not with ASC or pro-Casp-1 (Fig 1C).  
87 NLRP3 protein harbors several prototypic domains, including PYRIN domain (PYD),  
88 NACHT-associated domain (NAD), and Leucine rich repeats (LRR) (Ye & Ting, 2008). Next, the  
89 domain of NLRP3 involved in the interaction with STING was determined by evaluating the  
90 plasmids encoding NLRP3, PYRIN, NACHT, or LRR (Figure 1D) as described previously (Wang et  
91 al, 2018). Like NLRP3, NACHT and LRR interacted with STING, but PYRIN failed to interact  
92 with STING (Figure 1E), and consistently, STING interacted with NLRP3, NACHT, and LRR (Fig  
93 1F, lanes 2, 6 and 8), but not with PYRIN (Fig 1F, lane 4). In another hand, STING comprises five  
94 putative transmembrane (TM) regions (Ishikawa & Barber, 2008). The domain of STING required  
95 for the interaction with NLRP3 was assessed by analyzing plasmids encoding wild-type (WT)  
96 STING and seven truncated proteins (Fig 1G). Like WT STING(1–379aa) (Fig 1H, lane 9), the  
97 truncated proteins STING(1–160aa), STING(1–240aa), STING(41–379aa), STING(81–379aa), and  
98 STING(111–379aa) interacted strongly with NLRP3 (Fig 1H, lane 2–6), STING(151–379aa)  
99 associated weakly with NLRP3 (Fig 1H, lane 7), but STING(211–379aa) failed to interact with  
100 NLRP3 (Fig 1H, lane 8), indicating that TM5 (151–160aa) of STING is involved in the interaction

101 with NLRP3.

102       The role of STING in the regulation of the NLRP3 inflammasome was explored by using a  
103 pro-Casp-1 activation and pro-IL-1 $\beta$  cleavage cell system as established previously (Wang et al.,  
104 2017). In this system (NACI), HEK293T cells were co-transfected with plasmids encoding NLRP3,  
105 ASC, pro-Casp1, and pro-IL-1 $\beta$ . In the NACI cells, IL-1 $\beta$  secretion was stimulated by STING(1–  
106 160aa), STING(1–240aa), STING(41–379aa), or STING (Fig 1I, lane 2–4 and 9), but not by  
107 STING(81–379aa), STING(111–379aa), STING(151–379aa) or STING(211–379aa) (Fig 1I, lane 5–  
108 8), suggesting that TM2 (41–81aa) of STING is required for the induction of IL-1 $\beta$  secretion.  
109 Notably, STING promoted the NLRP3-ASC interaction (Fig 1J), an indicator of the inflammasome  
110 assembly (Compan et al., 2012) and enhanced NLRP3-mediated ASC oligomerization (Fig 1K),  
111 which is critical for inflammasome activation (Shenoy et al., 2012). Moreover, in HEK293T cells  
112 (Fig 1L) and HeLa cells (Fig 1M), NLRP3 and STING co-localized and formed large spots in the  
113 cytosol (Fig 1L and M), an indication of the NLRP3 inflammasome formation ((Martinon et al.,  
114 2009). Taken together, STING interacts with NLRP3 through TM5 domain and promotes the  
115 assembly and activation of the NLRP3 inflammasome through TM2 domain.

116

### 117 **HSV-1 infection promotes the STING-NLRP3 interaction.**

118 STING plays a key role in host innate immune response in response to pathogen infections and  
119 cytosolic DNA simulation (Ishikawa & Barber, 2008). We evaluated the effects of HSV-1 infection  
120 and HSV120 transfection, a biotinylated dsDNA representing the genomes of HSV-1 that efficiently  
121 induces STING-dependent type I IFN production as reported previously (Abe et al., 2013) on the  
122 STING-NLRP3 interaction. In TPA-differentiated human leukemic monocyte (THP-1) macrophages,

123 HSV-1 infection facilitated endogenous NLRP3-STING interaction and promoted endogenous  
124 STING-NLRP3 interaction (Fig 2A, B). In HEK293T cells and HeLa cells (Fig 2D), the  
125 STING-NLRP3 interaction was enhanced upon HSV-1 infection (Fig 2C, D). Similarly, in  
126 TPA-differentiated THP-1 macrophages, HEK293T cells, and HeLa cells, the NLRP3-STING  
127 interaction was promoted by HSV120 transfection (Fig 2E–G). Moreover, in primary mouse  
128 embryo fibroblasts (MEFs), HSV-1 infection and HSV120 transfection facilitated endogenous  
129 STING-NLRP3 interaction (Fig 2H). Collectively, HSV-1 infection and HSV120 transfection  
130 facilitate the interaction of STING with NLRP3.

131

### 132 **HSV-1 infection induces IL-1 $\beta$ expression and secretion.**

133 Next, we explored whether HSV-1 infection and HSV120 transfection regulate the NLRP3  
134 inflammasome activation. In TPA-differentiated THP-1 macrophages, endogenous IL-1 $\beta$  secretion  
135 was induced by Nigericin (a positive control for the inflammasome activation) and HSV-1 (Fig 3A,  
136 B). Consistently, IL-1 $\beta$  maturation and Casp-1 cleavage, as well as pro-IL-1 $\beta$  production were  
137 activated upon HSV-1 infection (Fig 3C, D). Notably, IL-1 $\beta$  mRNA was not induced by Nigericin  
138 but induced upon HSV-1 infection (Fig 3E, F) and HSV-1 ICP27 mRNA was expressed in the  
139 infected cells (Fig 3G, H). Similarly, in TPA-differentiated THP-1 macrophages, IL-1 $\beta$  secretion  
140 was induced by Nigericin and facilitated by HSV120 (Fig 3I). IL-1 $\beta$  maturation and Casp-1  
141 cleavage and pro-IL-1 $\beta$  production were stimulated by Nigericin and promoted by HSV120 (Fig 3J).  
142 IFN- $\beta$  mRNA expression was not induced by Nigericin but activated by HSV120 (Fig 3K),  
143 demonstrating that HSV120 is effective in the cells. Moreover, in mice primary MEFs, endogenous  
144 IL-1 $\beta$  secretion was induced by ATP (a positive control), promoted upon HSV-1 infection, and

145 enhanced by HSV120 stimulation (Fig 3L, M). HSV-1 ICP27 mRNA was detected in the cells (Fig  
146 3N), suggesting that HSV-1 is replicated. IFN- $\beta$  mRNA was not induced by ATP but activated by  
147 HSV120 in the cells (Fig 3O), demonstrating that HSV120 is effective. Therefore, IL-1 $\beta$  expression  
148 and secretion are induced upon DNA virus infection and cytosolic DNA stimulation.

149

150 **The NLRP3 inflammasome is required for HSV-1-induced IL-1 $\beta$  activation.**

151 Accordingly, we determined whether the NLRP3 inflammasome is required for HSV-1 in the  
152 induction of IL-1 $\beta$  activation. Initially, the effects of glybenclamide (NLRP3 inhibitor) and  
153 Ac-YVAD-cmk (Casp-1 inhibitor) (Wang et al., 2015) on HSV-1-mediated IL-1 $\beta$  activation were  
154 evaluated. In TPA-differentiated THP-1 macrophages, IL-1 $\beta$  secretion (Fig 4A, C) as well as IL-1 $\beta$   
155 (p17) cleavage and Casp-1(p20 and p22) maturation (Fig 4B, D) activated by Nigericin and HSV-1  
156 were significantly attenuated by glybenclamide (Fig 4A, B) or Ac-YVAD-cmk (Fig 4C, D). HSV-1  
157 ICP27 mRNA was expressed in infected cells (Fig 4E, F), indicating that HSV-1 is replicated.

158 In addition, the role of endogenous NLRP3 inflammasome in HSV-1-induced IL-1 $\beta$  activation  
159 was assessed in THP-1 cell lines stably expressing negative control shRNA (sh-NC) and shRNAs  
160 (sh-NLRP3, sh-ASC and sh-Casp-1) targeting the NLRP3 inflammasome components. Notably,  
161 IL-1 $\beta$  secretion (Fig 4G, I) as well as IL-1 $\beta$  (p17) cleavage and Casp-1 (p20 and p22) maturation  
162 (Fig 4H, J, top) induced by Nigericin (Fig 4G, H) or HSV-1 (Fig 4I, J) were attenuated by  
163 sh-NLRP3, sh-ASC, and sh-Casp-1. The NLRP3, ASC, and pro-Casp-1 proteins were  
164 own-regulated by sh-NLRP3, sh-ASC, and sh-Casp-1 stable cells, respectively (Fig 4H, J, bottom),  
165 indicating that shRNAs are effective in the cells. HSV-1 ICP27 mRNA was expressed in infected  
166 cells (Fig 4K), confirming that HSV-1 is replicated in the cells.



167 Moreover, the direct role of NLRP3 in the regulation of HSV-1-induced IL-1 $\beta$  secretion was  
168 determined in primary MEFs of C57BL/6 WT pregnant mice and NLRP3<sup>-/-</sup> pregnant mice. NLRP3  
169 protein was detected in WT mice primary MEFs, but not in NLRP3<sup>-/-</sup> mice primary MEFs (Fig 4L),  
170 indicating that NLRP3 is knocked out in the null mice. IL-1 $\beta$  secretion was induced by ATP and  
171 HSV-1 in WT mice primary MEFs but not in NLRP3<sup>-/-</sup> mice primary MEFs (Fig 4M). HSV-1 ICP27  
172 mRNA was expressed in infected cells, indicating that HSV-1 is replicated in the cells (Fig 4N).  
173 Collectively, inhibition, knock-down, and knock-out of the NLRP3 inflammasome components lead  
174 to the repression of IL-1 $\beta$  secretion and Casp-1 maturation, therefore the NLRP3 inflammasome is  
175 required for HSV-1-induced activation of IL-1 $\beta$ .

176

#### 177 **STING recruits NLRP3 to the ER to promote the inflammasome formation.**

178 STING predominantly resides in the endoplasmic reticulum (ER) to regulate innate immune  
179 signaling processes (Ishikawa & Barber, 2008). Here we evaluated whether STING recruits NLRP3  
180 to ER and activates the inflammasome. In HeLa cells, NLRP3 alone diffusely distributed in the  
181 cytoplasm and STING alone located in the ER (as indicated by the ER marker, ER blue), while  
182 NLRP3 and STING together co-localized and distributed in the ER to form specks (Fig 5A), which  
183 is an indication of the NLRP3 inflammasome complex formation (Martinon et al., 2009), suggesting  
184 that STING recruits NLRP3 to the ER and promotes the inflammasome formation. In addition,  
185 NLRP3 diffusely distributed in the cytosol of untreated cells, but formed distinct specks upon  
186 HSV-1 infection or HSV120 transfection (Fig 5B). Moreover, NLRP3 diffusely distributed in the  
187 cytosol of untreated cells, while upon HSV-1 infection or HSV120 transfection, NLRP3 forms  
188 distinct specks in the ER as indicated by Calnexin (ER protein) (Fig 5C) and ER blue (ER marker)

189 (Fig 5D). Notably, in transfected HeLa cells, NLRP3, STING, and Calnexin were detected in whole  
190 cell lysate (WCL) and purified ER fraction, and interestingly, NLRP3 abundance was enhanced by  
191 STING in purified ER fraction (Fig 5E). Similarly, in mock-infected THP-1 macrophages and mice  
192 primary MEFs, NLRP3, STING, and Calnexin were detected in WCL and purified ER, and NLRP3  
193 abundance was increased in the ER upon HSV-1 infection (Fig 5F, G). Therefore, STING, HSV-1,  
194 and HSV120 facilitate the NLRP3 inflammasome formation in the ER.

195         Moreover, the effect of endogenous STING on NLRP3 translocation to the ER was further  
196 determined by using shRNA targeting STING (sh-STING). HeLa cells stably expressing sh-NC or  
197 sh-STING were generated, and then transfected with Flag-NLRP3 and infected with HSV-1 or  
198 transfected with HSV120. In the absence of sh-STING, NLRP3 diffusely distributed in the cytosol  
199 of untreated cells and formed distinct specks in the ER, as indicated by Calnexin and ER Blue (Fig  
200 5H, I, top), upon HSV-1 infection or HSV120-transfection, however, in the presence of sh-STING,  
201 NLRP3 failed to form specks upon HSV-1 infection or HSV120 transfection (Fig 5H, I, bottom),  
202 indicating that STING knock-down leads to the repression of HSV-1-induced formation of the  
203 NLRP3 inflammasome. In addition, NLRP3, Calnexin, and STING were detected in WCL and  
204 purified ER fraction of HeLa cells (Fig 5J), THP-1 cells (Fig 5K) and mice primary MEFs (Fig 5L),  
205 and notably, NLRP3 level was higher in purified ER fraction upon HSV-1 infection in sh-NC stable  
206 cells (Fig 5J–L, lane 6 vs. 5) as compared with sh-STING stable cells (Fig 5J–L, lane 8 vs. 7),  
207 suggesting that STING knock-down results in the attenuation of NLRP3 translocation to the ER  
208 upon HSV-1 infection. We also confirmed that STING abundance was down-regulated by  
209 sh-STING (Fig 5J–L). Collectively, STING recruits NLRP3 to the ER and promotes the NLRP3  
210 inflammasome formation upon HSV-1 infection and cytosolic DNA stimulation.

211

212 **STING deubiquitinates NLRP3 to activate the NLRP3 inflammasome.**

213 The deubiquitination of NLRP3 is required for the NLRP3 inflammasome activation (Juliana et al.,  
214 2012). We next investigated whether STING plays a role in the deubiquitination of NLRP3, thereby  
215 facilitating the inflammasome activation. Interestingly, NLRP3 polyubiquitination catalyzed by  
216 HA-UB, HA-UB(K48R), or HA-Ub(K63R) was repressed by STING (Fig 6A, B). We also revealed  
217 that NLRP3 polyubiquitination catalyzed by HA-UB, HA-UB(K48O) (ubiquitin mutant that only  
218 retains a single lysine residue), or HA-UB(K63O) (ubiquitin mutant that only retains a single lysine  
219 residue) was suppressed by STING (Fig 6C). These results reveal that STING removes K48- and  
220 K63-linked polyubiquitination of NLRP3.

221 In addition, we examined whether HSV-1 infection and HSV120 transfection regulate the  
222 deubiquitination of NLRP3. Notably, NLRP3 polyubiquitination catalyzed by HA-UB was  
223 attenuated upon HSV-1 infection (Fig 6D) or by HSV120 transfection (Fig 6E). In THP-1  
224 differentiated macrophages, UB-catalyzed (Fig 6F, top), K48-linked (Fig 6F, middle), and  
225 K63-linked (Fig 6F, bottom) polyubiquitination of endogenous NLRP3 was repressed upon HSV-1  
226 infection; and UB-catalyzed polyubiquitination of endogenous NLRP3 was repressed by HSV120  
227 (Fig 6G). Moreover, in mice primary MEFs, UB-catalyzed polyubiquitination of endogenous  
228 NLRP3 was attenuated upon HSV-1 infection (Fig 6H). Therefore, HSV-1 infection and HSV120  
229 stimulation promote the deubiquitination of endogenous NLRP3. Moreover, upon HSV-1 infection,  
230 the polyubiquitination of endogenous NLRP3 was attenuated in the presence of sh-NC but relatively  
231 unaffected in the presence of sh-STING (Fig 6I), indicating that STING knock-down leads to  
232 repression of NLRP3 deubiquitination. Taken together, STING removes K48- and K63-linked

233 polyubiquitination of NLRP3 to promote the inflammasome activation upon HSV-1 infection and  
234 cytosolic DNA stimulation.

235

236 **STING is required for the NLRP3 inflammasome activation upon DNA virus infection.**

237 Since STING recruits NLRP3 to the ER and removes NLRP3 deubiquitination upon HSV-1  
238 infection, we speculated that STING may play a role in HSV-1-induced NLRP3 inflammasome  
239 activation. The effect of STING knock-down on HSV-1-induced NLRP3 inflammasome activation  
240 was initially examined in THP-1 cells stably expressing sh-STING. Endogenous IL-1 $\beta$  secretion as  
241 well as IL-1 $\beta$  (p17) cleavage and Casp-1 (p20 and p22) maturation induced by HSV-1 were  
242 significantly attenuated by sh-STING (Fig 7A, B). HSV-1 ICP27 mRNA was detected in HSV-1  
243 infection cells (Fig 7C), indicating that HSV-1 is replicated. Additionally, endogenous IL-1 $\beta$   
244 secretion, IL-1 $\beta$  (p17) maturation, and Casp-1 (p20 and p22) cleavage induced by DNA90, HSV120,  
245 or HSV-1 were suppressed by sh-STING (Fig 7D, E). Thus, STING knock-down leads to the  
246 suppression of IL-1 $\beta$  secretion and Casp-1 maturation upon DNA virus infection and cytosolic DNA  
247 stimulation.

248 Accordingly, we determine whether STING plays a specific role in the NLRP3 inflammasome  
249 activation mediated by DNA virus. THP-1 cells stably expressing sh-STING were differentiated to  
250 macrophages, and then treated with Nigericin or infected with HSV-1. Notably, sh-STING  
251 significantly attenuated endogenous IL-1 $\beta$  secretion as well as L-1 $\beta$  (p17) maturation and Casp-1  
252 (p20 and p22) cleavage induced upon HSV-1 infection, but had no effect on IL-1 $\beta$  secretion or  
253 IL-1 $\beta$  (p17) maturation and Casp-1 (p20 and p22) cleavage induced by Nigericin stimulation (Fig 7F,  
254 G). HSV-1 ICP27 mRNA was detected in HSV-1 infection cells (Fig 7H), indicating that HSV-1 is

255 replicated in the cells. Moreover, we explored whether STING plays roles in the NLRP3  
256 inflammasome activation induced by RNA viruses. THP-1 differentiated macrophages stably  
257 expressing sh-STING were infected with RNA viruses, Sendai virus (SeV) and Zika virus (ZIKV),  
258 or with HSV-1. Interestingly, endogenous IL-1 $\beta$  secretion as well as IL-1 $\beta$  (p17) maturation and  
259 Casp-1 (p20 and p22) cleavage were induced upon the infections of the three viruses, however,  
260 HSV-1-mediated induction was attenuated by sh-STING, but SeV- or ZIKV-mediated inductions  
261 were not affected by sh-STING (Fig 7I, J). SeV P mRNA, ZIKV mRNA, and HSV-1 ICP27 mRNA  
262 were detected in infected cells, respectively (Fig 7K–M). Taken together, STING plays specific  
263 roles in the NLRP3 inflammasome activation upon DNA virus infection or cytosolic DNA  
264 stimulation, but has no effect on the inflammasome activation induced by RNA virus infection or  
265 Nigericin stimulation.

### 266

### 267 **NLRP3 is critical for host defense against HSV-1 infection in mice.**

268 To gain insights into the biological function of NLRP3 *in vivo*, we analyzed C57BL/6 NLRP3<sup>+/+</sup>  
269 WT mice and C57BL/6 NLRP3<sup>-/-</sup> deficiency mice. Notably, HSV-1-infected NLRP3<sup>-/-</sup> mice began to  
270 die at 5 days post-infection and all infected mice died at 7 days post-infection, while infected WT  
271 mice began to die at 7 days post-infection and 30% WT mice was survival after 11 days  
272 post-infection (Fig 8A). The body weights of infected NLRP3<sup>-/-</sup> mice decreased continuously until  
273 died, while the body weights of infected WT mice gradually decreased until 7 days post-infection  
274 and then gradually increased (Fig 8B). Thus, NLRP3 deficiency mice are more susceptibility to  
275 HSV-1 infection and exhibit early onset of death upon the infection.

276 Notably, in the mice blood, IL-1 $\beta$  secretion was induced upon HSV-1 infection in WT mice,

277 whereas it was not induced in NLRP3<sup>-/-</sup> mice (Fig 8C), IL-1 $\beta$  mRNA level was higher in WT mice  
278 as compared with NLRP3<sup>-/-</sup> mice (Fig 8D), IL-6 mRNA and TNF- $\alpha$  mRNA were no significant  
279 difference between WT and NLRP3<sup>-/-</sup> mice (Fig 8E, F), and HSV-1 UL30 mRNA was expressed in  
280 infected WT and NLRP3<sup>-/-</sup> mice (Fig 8G). These results indicate that NLRP3 deficiency leads to the  
281 repression of IL-1 $\beta$  expression and secretion in mice. Interestingly, in HSV-1 infected mice lung and  
282 brain, IL-1 $\beta$  mRNA and IL-6 mRNA were significantly higher in WT mice as compared with  
283 NLRP3<sup>-/-</sup> mice (Fig 8H, I, K and L), however, the viral titers were much lower in WT mice as  
284 compared with NLRP3<sup>-/-</sup> mice (Fig 8J, M), suggesting that NLRP3 deficiency results in the  
285 attenuation of IL-1 $\beta$  expression and the promotion of HSV-1 replication in mice lung and brain.  
286 Moreover, Hematoxylin and Eosin (H&E) staining showed that more infiltrated neutrophils and  
287 mononuclear cells were detected in the lung and brain of infected WT mice as compared with  
288 NLRP3<sup>-/-</sup> mice (Fig 8N), and immunohistochemistry (IHC) analysis revealed that IL-1 $\beta$  protein  
289 level was higher in the lung and brain of infected WT mice as compared with NLRP3<sup>-/-</sup> mice (Fig  
290 8O), revealing that NLRP3 deficiency mice are more susceptibility to HSV-1 infection and elicit  
291 weak inflammatory responses. Collectively, we propose that NLRP3 is essential for host defense  
292 against HSV-1 infection by facilitating IL-1 $\beta$  activation (Fig 9).

293

294 **Discussion**

295

296 This study reveals a distinct mechanism by which the cGAS-STING-NLRP3 pathway promotes the  
297 NLRP3 inflammasome activation and IL-1 $\beta$  secretion upon DNA virus infection and cytosolic DNA  
298 stimulation. The cGAS-STING pathway mediates immune defense against infection of  
299 DNA-containing pathogens and detects tumor-derived DNA and generates intrinsic antitumor  
300 immunity (Chen et al., 2016; Wu et al., 2013). More recent studies reported that in human  
301 monocytes, the cGAS-STING pathway is essential for cytosolic DNA induced-NLRP3  
302 inflammasome (Gaidt et al., 2017) and in mice BMDMs, the cGAS-STING pathway is required for  
303 Chlamydia trachomatis-induced inflammasome activation and IL-1 $\beta$  secretion (Webster et al., 2017;  
304 Swanson et al., 2017). Our results are consistent with the reports and further support that  
305 cGAS-STING pathway is essential not only for cytosolic DNA induced- or Chlamydia  
306 trachomatis-induced NLRP3 inflammasome activation, but also for DNA virus-induced NLRP3  
307 inflammasome activation. This study also further reveals that the cGAS-STING pathway is required  
308 for the NLRP3 inflammasome activation not only in human monocytes and mice BMDMs, but also  
309 in human embryonic kidney cells (HEK293T), Hela cells, human leukemic monocytes/macrophages  
310 (THP-1), and mice primary mouse embryo fibroblasts (MEFs). More interestingly, our results reveal  
311 a distinct mechanism underlying STING-mediated NLRP3 inflammasome activation, and  
312 demonstrate for the first time that STING binds to NLRP3 and promotes the inflammasome  
313 activation through two approaches. First, STING binds to and recruits NLRP3 to the ER to promote  
314 the formation of the NLRP3 inflammasome. Second, STING interacts with NLRP3 and removes  
315 K48- and K63-linked polyubiquitination of NLRP3 to induce the activation of the NLRP3

316 inflammasome. Notably, upon HSV-1 infection and HSV120 stimulation, STING binds to NLRP3,  
317 promotes the NLRP3-ASC interaction (an indicator of inflammasome complex assembly) (Compan  
318 et al., 2012), facilitates NLRP3-mediated ASC oligomerization (a critical step for inflammasome  
319 activation) (Shenoy et al., 2012), enhances NLRP3 to form specks (an indicator of inflammasome  
320 activation) (Martinon et al, 2009), and enhances IL-1 $\beta$  secretion (a fundamental reaction of the  
321 inflammatory responses) (Dinarello, 2009). Collectively, the cGAS-STING-NLRP3 pathway plays  
322 key roles in the NLRP3 inflammasome activation and IL-1 $\beta$  secretion upon DNA virus infection  
323 and cytosolic DNA stimulation.

324 Notably, STING knock-down attenuates the NLRP3 inflammasome activation mediated upon  
325 DNA virus infection or cytosolic DNA stimulation, but has no effect on the NLRP3 inflammasome  
326 activation induced by RNA virus infection or Nigericin induction. Many RNA viruses induce the  
327 NLRP3 inflammasome activation, including influenza A virus (IAV) (Kanneganti et al., 2006),  
328 Vesicular mastitis virus (VSV) and Encephalomyocarditis virus (EMCV) (Rajan et al., 2011),  
329 Measles virus (MV) (Komune et al., 2011), West Nile virus (WNV) (Ramos et al., 2012), Rabies  
330 virus (RV) (Lawrence et al., 2013), Hepatitis C virus (HCV) (Negash et al., 2013), Dengue virus  
331 (DENV) (Hottz et al., 2013), Enterovirus 71 (EV71) (Wang et al., 2017) and Zika virus (ZIKV)  
332 (Wang et al., 2018). Some DNA viruses also regulate the NLRP3 inflammasome activation, such as  
333 Adenovirus (AdV) (Muruve et al., 2008) and HSV-1 (Johnson et al., 2013). HSV-1 VP22 inhibits  
334 AIM2-dependent inflammasome activation so that HSV-1 infection of macrophages-induced  
335 inflammasome activation is AIM2-independent (Maruzuru et al., 2018). Here, we demonstrate that  
336 the cGAS-STING-NLRP3 pathway is required for HSV-1-induced NLRP3 inflammasome  
337 activation and critical for host defense against DNA virus infection.



338 The mechanisms of NLRP3 inflammasome activation have been intensely studied. The  
339 mitochondria-associated adaptor protein (MAVS) promotes NLRP3 mitochondrial localization and  
340 the inflammasome activation (Subramanian et al., 2013). PtdIns4P mediates the NLRP3  
341 inflammasome activation in trans-Golgi network (TGN) (Chen & Chen, 2018). NLRP3 associates  
342 with SCAP-SREBP2 to form a ternary complex that translocates to the Golgi apparatus for optimal  
343 inflammasome assembly (Guo et al., 2018). Here we find that STING promotes NLRP3  
344 translocation to the ER and facilitates the inflammasome activation. Moreover, post-translational  
345 modifications of NLRP3 are critical for its activation, including phosphorylation (Song & Li, 2018),  
346 SUMOylation (Barry et al., 2018), and ubiquitination (Py et al., 2013). MARCH7 and TRIM31  
347 facilitate NLRP3 ubiquitination and proteasomal degradation (Song et al., 2016; Yan et al., 2015).  
348 Pellino2 promotes K63-linked ubiquitination of NLRP3 as part of the priming phase (Humphries et  
349 al., 2018). Interestingly, we demonstrate that STING removes K48- and K63-linked ubiquitination  
350 of NLRP3 to promote the inflammasome activation, and reveal that HSV-1 infection induces  
351 STING-mediated deubiquitination of NLRP3.

352 Moreover, NLRP3 is related to many human diseases. Fibrillar amyloid- $\beta$  peptide, the major  
353 component of Alzheimer's disease brain plaques, facilitates the NLRP3 inflammasome activation  
354 (Halle et al., 2008). Monosodium urate (MSU) crystals induce the autoinflammatory disease gout  
355 and activate the NLRP3 inflammasome (Martinon et al., 2006). NLRP3, IL-1 $\beta$ , reactive oxygen  
356 species (ROS), and TXNIP are implicated in the type 2 diabetes mellitus (T2DM) pathogenesis  
357 (Schroder et al., 2010). Our study gains insights into the biological function of the  
358 cGAS-STING-NLRP3 pathway in host defense against HSV-1 infection in mice. NLRP3 deficiency  
359 mice are more susceptible to HSV-1 infection, exhibit early onset of death upon infection,

360 represses IL-1 $\beta$  secretion, and elicits robust inflammatory responses in the tissues. Collectively,  
361 these results demonstrate that NLRP3 is essential for host defense against HSV-1 infection by  
362 inducing IL-1 $\beta$  expression and secretion.

363         In conclusion, we reveal a distinct mechanism underlying the regulation of the NLRP3  
364 inflammasome activation upon DNA virus infection. In this model, STING (the central molecule of  
365 the antiviral and inflammatory immune pathways) interacts with NLRP3 (the key component of the  
366 inflammasomes), removes NLRP3 polyubiquitination, recruits NLRP3 to the ER, and facilitates the  
367 NLRP3 inflammasome activation, thereby inducing IL-1 $\beta$  secretion upon DNA virus infection and  
368 cytosolic DNA stimulation.

369

370 **Materials and Methods**

371

372 **Animal study**

373 C57BL/6 WT mice were purchased from Hubei Research Center of Laboratory Animals  
374 (Wuhan, Hubei, China). C57BL/6 NLRP3<sup>-/-</sup> mice were kindly provided by Dr. Di Wang of Zhejiang  
375 University School of Medicine, China.

376 The primary mouse embryo fibroblasts (MEFs) were prepared from pregnancy mice of  
377 C57BL/6 WT mice and C57BL/6 NLRP3<sup>-/-</sup> mice in E14 and cultured in Dulbecco modified Eagle  
378 medium (DMEM) containing 10% heat-inactivated fetal bovine serum (FBS).

379

380 **Ethics statement.**

381 All animal studies were performed in accordance with the principles described by the Animal  
382 Welfare Act and the National Institutes of Health Guidelines for the care and use of laboratory  
383 animals in biomedical research. All procedures involving mice and experimental protocols were  
384 approved by the Institutional Animal Care and Use Committee (IACUC) of the College of Life  
385 Sciences, Wuhan University.

386

387 **Cell lines and cultures**

388 African green monkey kidney epithelial (Vero) cells, human cervical carcinoma (Hela) cells,  
389 and human embryonic kidney 293T (HEK 293T) cells were purchased from American Type Culture  
390 Collection (ATCC) (Manassas, VA, USA). Human acute monocytic leukemia (THP-1) cells were  
391 gift from Dr. Jun Cui of State Key Laboratory of Biocontrol, School of Life Sciences, Sun Yat-Sen

392 University, Guangzhou 510275, China. THP-1 cells were cultured in RPMI 1640 medium  
393 supplemented with 10% heat-inactivated fetal bovine serum (FBS), 100 U/ml penicillin, and 100  
394 µg/ml streptomycin sulfate. Vero, Hela and HEK293T cells were cultured in Dulbecco modified  
395 Eagle medium (DMEM) purchased from Gibco (Grand Island, NY, USA) supplemented with 10%  
396 FBS, 100 U/ml penicillin and 100 µg/ml streptomycin sulfate. Vero, Hela, HEK293T and THP-1  
397 cells were maintained in an incubator at 37°C in a humidified atmosphere of 5% CO<sub>2</sub>.

398

### 399 **Reagents**

400 Lipopolysaccharide (LPS), adenosine triphosphate (ATP), Endoplasmic Reticulum Isolation  
401 Kit (ER0100), phorbol-12-myristate-13-acetate (TPA) and dansylsarcosine piperidinium salt (DSS)  
402 were purchased from Sigma-Aldrich (St. Louis, MO, USA). RPMI 1640 and Dulbecco modified  
403 Eagle medium (DMEM) were obtained from Gibco (Grand Island, NY, USA). Nigericin and  
404 Ac-YVAD-cmk were obtained from InvivoGene Biotech Co., Ltd. (San Diego, CA, USA). Antibody  
405 against Flag (F3165), HA (H6908) and monoclonal mouse anti-GAPDH (G9295) were purchased  
406 from Sigma (St. Louis, MO, USA). Monoclonal rabbit anti-NLRP3 (D2P5E), Ubiquitin mouse mAb  
407 (P4D1), monoclonal rabbit anti-K63-linkage Specific Polyubiquitin (D7A11), monoclonal rabbit  
408 anti-K48-linkage Specific Polyubiquitin (D9D5), monoclonal rabbit anti-STING(D2P2F),  
409 monoclonal rabbit anti-calnexin(C5C9), monoclonal rabbit anti-IL-1β (D3U3E), IL-1β mouse mAb  
410 (3A6) and monoclonal rabbit anti-Caspase-1 (catalog no. 2225) were purchased from Cell Signaling  
411 Technology (Beverly, MA, USA). Monoclonal mouse anti-ASC (sc-271054) and polyclonal rabbit  
412 anti-IL-1β (sc-7884) were purchased from Santa Cruz Biotechnology (Santa Cruz, CA, USA).  
413 Monoclonal mouse anti-NLRP3 (AG-20B-0014-C100) was purchased from Adipogen to detection

414 endogenous NLRP3 in THP1 cells and primary MEFs. Lipofectamine 2000, ER-Tracker™  
415 Blue-White DPX (E12353), normal rabbit IgG and normal mouse IgG were purchased from  
416 Invitrogen Corporation (Carlsbad, CA, USA).

417

#### 418 **Viruses**

419 Herpes simplex virus 1 (HSV-1) strain and Sendai virus (SeV) strain were gifts from Dr. Bo  
420 Zhong of Wuhan University. Zika virus (ZIKV) isolate z16006 (GenBank accession number  
421 KU955589.1) was used in this study. Vero cells were maintained at 37°C in DMEM (GIBCO)  
422 supplemented with 10% heat-inactivated FBS with penicillin/streptomycin (GIBCO) (Grand Island,  
423 NY, USA). HSV-1 stocks were propagated in Vero cells for 36 h at 0.03 MOI. The infected cells  
424 were harvested and resuspended by PBS. HSV-1 was collected after three times of freezing and  
425 thawing in the infected cells and titrated by plaque assay in 12-well plates in Vero cells.

426

#### 427 **Plaque assay**

428 Vero cells were cultured in a 12-well plate at a density of  $2 \times 10^5$  cells per well, and infected  
429 with 100  $\mu$ l serially diluted HSV-1 supernatant for 2 h. Then, the cells were washed by PBS and  
430 then immediately replenished with plaque medium supplemented with 1% carboxymethylcellulose.  
431 The infected Vero cells were incubated for 2–3 days. After the incubation, plaque medium was  
432 removed and cells were fixed and stained with 4% formaldehyde and 0.5% crystal violet.

433

#### 434 **THP-1 macrophages stimulation**

435 THP-1 cells were differentiated into macrophages with 100 ng/ml

436 phorbol-12-myristate-13-acetate (TPA) for 12 h, and cells were cultured for 24 h without TPA.  
437 Differentiated cells were then stimulated with HSV-1 infection, HSV120 transfection, DNA90  
438 transfection, Sendai virus (SeV) infection, Zika virus (ZIKV) infection, or Nigericin treatment.  
439 Supernatants were collected for measurement of IL-1 $\beta$  by Enzyme-linked immunosorbent assay  
440 (ELISA). Cells were harvested for real-time PCR or immunoblot analysis.

441

#### 442 **Plasmid construction**

443 The cDNAs encoding human STING, NLRP3, ASC, pro-Casp-1, and IL-1 $\beta$  were obtained by  
444 reverse transcription of total RNA from TPA-differentiated THP-1 cells, followed by PCR using  
445 specific primers. The cDNAs were sub-cloned into pcDNA3.1(+) and pcagg-HA vector. The  
446 pcDNA3.1(+)-3 $\times$ Flag vector was constructed from pcDNA3.1(+) vector through inserting the  
447 3 $\times$ Flag sequence between the NheI and HindIII site. Following are the primers used in this study.

448 Flag-NLRP3: 5'-CGCGGATCCATGAAGATGGCAAGCACCCGC-3',

449 5'-CCGCTCGAGCTACCAAGAAGGCTCAAAGAC-3'; Flag-ASC:

450 5'-CCGGAATTCATGGGGCGCGCGCGACGCCAT-3',

451 5'-CCGCTCGAGTCAGCTCCGCTCCAGGTCCTCCA-3'; Flag-Casp-1:

452 5'-CGCGGATCCATGGCCGACAAGGTCCTGAAG-3',

453 5'-CCGCTCGAGTTAATGTCCTGGGAAGAGGTA-3'; Flag-IL-1 $\beta$ :

454 5'-CCGGAATTCATGGCAGAAGTACCTGAGCTC-3',

455 5'-CCGCTCGAGTTAGGAAGACACAAATTGCAT-3'; Flag-STING:

456 5'-CCGGAATTCTATGCCCCACTCCAGCCTGCA-3',

457 5'-CCGCTCGAGTCAAGAGAAATCCGTGCGGAG-3'. HA-NLRP3:

458 5'-TACGAGCTCATGAAGATGGCAAGCACCCGC-3',  
459 5'-CCGCTCGAGCCAAGAAGGCTCAAAGACGAC-3'; HA-ASC:  
460 5'-CCGGAATTCATGGGGCGCGCGCGACGCC-3',  
461 5'-CCGCTCGAGGCTCCGCTCCAGGTCTCCAC-3'; HA-Casp-1:  
462 5'-CCGGAATTCATGGCCGACAAGGTCTGAAG-3',  
463 5'-CCGCTCGAGATGTCCTGGGAAGAGGTAGAA-3'.

464 The STING truncates was cloned into pcDNA3.1(+) and the PYRIN, NACHT, and LRR  
465 domain of NLRP3 protein was cloned into pcDNA3.1(+) and pcaggs-HA vector using specific  
466 primers, which are listed as follows. Flag-STING(1-160):

467 5'-CGCGGATCCATGCCCCACTCCAGCCTGCAT-3',  
468 5'-CCGGAATTCTGCCAGCCCATGGGCCACGTT-3'; Flag-STING(1-240):  
469 5'-CGCGGATCCATGCCCCACTCCAGCCTGCAT-3',  
470 5'-CCGGAATTCGTAAACCCGATCCTTGATGCC-3; Flag-STING(41-379):  
471 5'-CGCGGATCCATGGAGCACACTCTCCGGTAC-3',  
472 5'-CCGGAATTCTCAAGAGAAATCCGTGCGGAG-3'; Flag-STING(81-379):  
473 5'-CGCGGATCCATGTACTGGAGGACTGTGCGG-3',  
474 5'-CCGGAATTCTCAAGAGAAATCCGTGCGGAG-3'; Flag-STING(111-379):  
475 5'-CGCGGATCCATGGCGGTCGGCCCCGCCCTTC-3',  
476 5'-CCGGAATTCTCAAGAGAAATCCGTGCGGAG-3'; Flag-STING(151-379):  
477 5'-CGCGGATCCATGAATTTCAACGTGGCCCAT-3',  
478 5'-CCGGAATTCTCAAGAGAAATCCGTGCGGAG-3', Flag-STING(211-379):  
479 5'-CGCGGATCCATGCTGGATAAACTGCCCCAG-3',

480 5'-CCGGAATTCTCAAGAGAAATCCGTGCGGAG-3'; HA-PYRIN:

481 5'-CCGGAATTCATGAAGATGGCAAGCACCCGC-3',

482 5'-CCGCTCGAGTAAACCCATCCACTCCTCTTC-3'; HA-NACHT:

483 5'-CCGGAATTCATGCTGGAGTACCTTTCGAGA-3', HA-LRR:

484 5'-ATCGAGCTCATGTCTCAGCAAATCAGGCTG-3',

485 5'-CCGCTCGAGCCAAGAAGGCTCAAAGACGAC-3'.

486

#### 487 **Lentivirus production and infection.**

488 The targeting sequences of shRNAs for the human STING, NLRP3, ASC and Casp-1 were as

489 follows: sh-STING: GCCCGGATTCGAACTTACAAT; sh-NLRP3:

490 5'-CAGGTTTGACTATCTGTTCT-3'; sh-ASC: 5'-GATGCGGAAGCTCTTCAGTTTCA-3';

491 sh-caspase-1: 5'-GTGAAGAGATCCTTCTGTA-3'. A PLKO.1 vector encoding shRNA for a

492 negative control (Sigma-Aldrich, St. Louis, MO, USA) or a specific target molecule (Sigma-Aldrich)

493 was transfected into HEK293T cells together with psPAX2 and pMD2.G with Lipofectamine 2000.

494 Culture supernatants were harvested 36 and 60 h after transfection and then centrifuged at 2,200

495 rpm for 15 min. THP-1 cells were infected with the supernatants contain lentiviral particles in the

496 presence of 4 µg/ml polybrene (Sigma). After 48 h of culture, cells were selected by 1.5 µg/ml

497 puromycin (Sigma). HeLa cells were selected by 2.5 µg/ml puromycin (Sigma). The results of each

498 sh-RNA-targeted protein were detected by immunoblot analysis.

499

#### 500 **Enzyme-linked immunosorbent assay (ELISA)**

501 Concentrations of human IL-1β in culture supernatants were measured by ELISA kit (BD



502 Biosciences, San Jose, CA, USA). The mouse IL-1 $\beta$  ELISA Kit was purchased from R&D.

503

#### 504 **Activated caspase-1 and mature IL-1 $\beta$ measurement**

505 Supernatant of the cultured cells was collected for 1 ml in the cryogenic vials (Corning). The  
506 supernatant was centrifuged at 12,000 rpm for 10 min each time by Amicon Ultra (UFC500308)  
507 from Millipore for protein concentrate. The concentrated supernatant was mixed with SDS loading  
508 buffer for western blotting analysis with antibodies for detection of activated caspase-1 (D5782  
509 1:500; Cell Signaling) or mature IL-1 $\beta$  (Asp116 1:500; Cell Signaling). Adherent cells in each well  
510 were lysed with the lyses buffer described below, followed by immunoblot analysis to determine the  
511 cellular content of various protein.

512

#### 513 **Western blot analysis**

514 HEK293T whole-cell lysates were prepared by lysing cells with buffer (50 mM Tris-HCl,  
515 pH7.5, 300 mM NaCl, 1% Triton-X, 5 mM EDTA and 10% glycerol). The TPA-differentiated  
516 THP-1 cells lysates were prepared by lysing cells with buffer (50 mM Tris-HCl, pH7.5, 150 mM  
517 NaCl, 0.1% Nonidetp 40, 5 mM EDTA and 10% glycerol). Protein concentration was determined by  
518 Bradford assay (Bio-Rad, Hercules, CA, USA). Cultured cell lysates (30  $\mu$ g) were electrophoresed  
519 in an 8-12% SDS-PAGE gel and transferred to a PVDF membrane (Millipore, MA, USA). PVDF  
520 membranes were blocked with 5% skim milk in phosphate buffered saline with 0.1% Tween 20  
521 (PBST) before being incubated with the antibody. Protein band were detected using a Luminescent  
522 image Analyzer (Fujifilm LAS-4000).

523

## 524 **Co-immunoprecipitation assays**

525 HEK293T whole-cell lysates were prepared by lysing cells with buffer (50 mM Tris-HCl,  
526 pH7.5, 300 mM NaCl, 1% Triton-X, 5 mM EDTA, and 10% glycerol). TPA-differentiated THP-1  
527 cells lysates were prepared by lysing cells with buffer (50 mM Tris-HCl, pH7.5, 150 mM NaCl, 0.1%  
528 Nonidetp40, 5 mM EDTA, and 10% glycerol). Lysates were immunoprecipitated with control  
529 mouse immunoglobulin G (IgG) (Invitrogen) or anti-Flag antibody (Sigma, F3165) with Protein-G  
530 Sepharose (GE Healthcare, Milwaukee, WI, USA).

531

## 532 **Confocal microscopy**

533 HEK293T cells and Hela cells were transfected with plasmids for 24–36 h. Cells were fixed  
534 in 4% paraformaldehyde at room temperature for 15 min. After being washed three times with PBS,  
535 permeabilized with PBS containing 0.1% Triton X-100 for 5 min, washed three times with PBS, and  
536 finally blocked with PBS containing 5% BSA for 1 h. The cells were then incubated with the  
537 monoclonal mouse anti-Flag antibody (F3165, Sigma) and Monoclonal rabbit anti-HA (H6908,  
538 Sigma) overnight at 4°C, followed by incubation with FITC-conjugate donkey anti-mouse IgG  
539 (Abbkine) and Dylight 649-conjugate donkey anti-rabbit IgG (Abbkine) for 1 h. After washing three  
540 times, cells were incubated with DAPI solution for 5 min, and then washed three more times with  
541 PBS. Finally, the cells were analyzed using a confocal laser scanning microscope (Fluo View  
542 FV1000; Olympus, Tokyo, Japan).

543

## 544 **Real-time PCR**

545 Total RNA was extracted with TRIzol reagent (Invitrogen), following the manufacturer's

546 instructions. Real-time quantitative-PCR was performed using the Roche LC480 and SYBR  
547 qRT-PCR kits (DBI Bio-science, Ludwigshafen, Germany) in a reaction mixture of 20  $\mu$ l SYBR  
548 Green PCR master mix, 1  $\mu$ l DNA diluted template, and RNase-free water to complete the 20  $\mu$ l  
549 volume. Real-time PCR primers were designed by Primer Premier 5.0 and their sequences were as  
550 follows: HSV-1 ICP27 forward, 5'-GCATCCTTCGTGTTTGCATT-3', HSV-1 ICP27 reverse,  
551 5'-GCATCTTCTCTCCGACCCCG-3'. HSV-1 UL30 forward,  
552 5'-CATCACCGACCCGGAGAGGGAC-3', HSV-1 UL30 reverse,  
553 5'-GGGCCAGGCGCTTGTTGGTGTA-3'. SeV P protein forward, 5'-  
554 CAAAAGTGAGGGCGAAGGAGAA-3', SeV P protein reverse, 5'-  
555 CGCCCAGATCCTGAGATACAGA-3'. ZIKV forward,  
556 5'-GGTCAGCGTCCTCTCTAATAAACG-3', ZIKV reverse,  
557 5'-GCACCCTAGTGTCCACTTTTTCC-3'. IL-1 $\beta$  forward,  
558 5'-CACGATGCACCTGTACGATCA-3', IL-1 $\beta$  reverse, 5'-GTTGCTCCATATCCTGTCCCT-3'.  
559 GAPDH forward, 5'-AAGGCTGTGGGCAAGG-3', GAPDH reverse,  
560 5'-TGGAGGAGTGGGTGTCG-3'. Mouse GAPDH forward, 5'-TGGCCTTCCGTGTTCCCTAC-3',  
561 Mouse GAPDH reverse, 5'-GAGTTGCTGTTGAAGTCGCA-3'. Mouse IL-1 $\beta$  forward,  
562 5'-GAAATGCCACCTTTTGACAGTG-3', Mouse IL-1 $\beta$  reverse,  
563 5'-TGGATGCTCTCATCAGGACAG-3'. Mouse IL-6 forward,  
564 5'-ACAAAGCCAGAGTCCTTCAGA -3', Mice IL-6 reverse,  
565 5'-TCCTTAGCCACTCCTTCTGT-3'. Mice TNF- $\alpha$  forward,  
566 5'-ACTGAACTTCGGGGTGATCG-3', Mice TNF- $\alpha$  reverse,  
567 5'-TCTTTGAGATCCATGCCGTTG-3'.

568

569 **ASC oligomerization detection**

570 HEK293T cells were transfected with plasmids for 24–36 h. Cell lysates were centrifugated at  
571 6000 rpm for 15 min. The supernatants of the lysates were mixed with SDS loading buffer for  
572 western blot analysis with antibody against ASC. The pellets of the lysates were washed with PBS  
573 for three times and cross-linked using fresh DSS (2 mM, Sigma) at 37°C for 30 min. The  
574 cross-linked pellets were then spanned down and the supernatant was mixed with SDS loading  
575 buffer for western blotting analysis.

576

577 **Statistical analyses**

578 All experiments were reproducible and repeated at least three times with similar results.  
579 Parallel samples were analyzed for normal distribution using Kolmogorov-Smirnov tests. Abnormal  
580 values were eliminated using a follow-up Grubbs test. Levene's test for equality of variances was  
581 performed, which provided information for Student's t-tests to distinguish the equality of means.  
582 Means were illustrated using histograms with error bars representing the SD; a P value of <0.05 was  
583 considered statistically significant.

584

585

586 **Acknowledgments**

587 We thank Dr. Di Wang of Zhejiang University School of Medicine, China for kindly providing  
588 C57BL/6 NLRP3<sup>-/-</sup> mice, Dr. Jun Cui of Sun Yat-Sen University, Guangzhou 510275, China for  
589 Human acute monocytic leukemia (THP-1) cells, and Dr. Bo Zhong of Wuhan University, China,  
590 for kindly providing Herpes simplex virus 1 strain, Sendai virus strain, and plasmids encoding  
591 ubiquitin and mutants.

592 This work was supported by National Natural Science Foundation of China (81730061 and  
593 81471942), Postdoctoral Science Foundation of China (2018T110923), National Health and Family  
594 Planning Commission of China (National Mega Project on Major Infectious Disease Prevention)  
595 (2017ZX10103005 and 2017ZX10202201), and Guangdong Province “Pearl River Talent Plan”  
596 Innovation and Entrepreneurship Team Project (2017ZT07Y580).

597

598 **Author contributions:**

599 W.W., D.H., Y.F., Q.Z., W.L., F.L., K.W., G.L., Y.L., and J.W. contributed the conceptualization.

600 W.W., D.H., Y.F., C.W., A.L., Y.W., K.C., M.T., F.X., Q.Z., M.A.S., W.C., P.P., P.W., and W.L.

601 contributed the methodology, conduction of experiments, and investigation. W.W., F.L., K.W., G.L.,

602 Y.L., and J.W. contributed the reagents and resources. W.W., and J.W. contributed the writing the

603 original draft of the paper. W.W., and J.W. contributed the review and editing the paper. F.L., K.W.,

604 G.L., and Y.L. contributed the visualization or funding acquisition. J.W. contributed the supervision

605 and funding acquisition.

606 **Conflict of Interests:** The authors have no conflict of interests.

607

608 **References**

609

610 Abe T, Barber GN (2014) Cytosolic-DNA-mediated, STING-dependent proinflammatory gene  
611 induction necessitates canonical NF-kappaB activation through TBK1. *J Virol* 88: 5328-5341

612 Abe T, Harashima A, Xia T, Konno H, Konno K, Morales A, Ahn J, Gutman D, Barber GN (2013)  
613 STING recognition of cytoplasmic DNA instigates cellular defense. *Mol Cell* 50: 5-15

614 Akira S, Uematsu S, Takeuchi O (2006) Pathogen recognition and innate immunity. *Cell* 124:  
615 783-801

616 Barry R, John SW, Liccardi G, Tenev T, Jaco I, Chen CH, Choi J, Kasperkiewicz P,  
617 Fernandes-Alnemri T, Alnemri E, Drag M, Chen Y, Meier P (2018) SUMO-mediated regulation  
618 of NLRP3 modulates inflammasome activity. *Nat Commun* 9: 3001

619 Chen J, Chen ZJ (2018) PtdIns4P on dispersed trans-Golgi network mediates NLRP3 inflammasome  
620 activation. *Nature* 564: 71-76

621 Chen Q, Sun L, Chen ZJ (2016) Regulation and function of the cGAS-STING pathway of cytosolic  
622 DNA sensing. *Nat Immunol* 17: 1142-1149

623 Compan V, Baroja-Mazo A, Lopez-Castejon G, Gomez AI, Martinez CM, Angosto D, Montero MT,  
624 Herranz AS, Bazan E, Reimers D, Mulero V, Pelegrin P (2012) Cell volume regulation  
625 modulates NLRP3 inflammasome activation. *Immunity* 37: 487-500

626 Dinarello CA (2009) Immunological and inflammatory functions of the interleukin-1 family. *Annu*  
627 *Rev Immunol* 27: 519-550

628 Gaidt MM, Ebert TS, Chauhan D, Ramshorn K, Pinci F, Zuber S, O'Duill F, Schmid-Burgk JL, Hoss  
629 F, Buhmann R, Wittmann G, Latz E, Subklewe M, Hornung V (2017) The DNA inflammasome

- 630 in human myeloid cells is initiated by a STING-cell death program upstream of NLRP3. *Cell*  
631 171: 1110-1124
- 632 Guo C, Chi Z, Jiang D, Xu T, Yu W, Wang Z, Chen S, Zhang L, Liu Q, Guo X, Zhang X, Li W, Lu  
633 L, Wu Y, Song BL, Wang D (2018) Cholesterol homeostatic regulator SCAP-SREBP2  
634 integrates NLRP3 inflammasome activation and cholesterol biosynthetic signaling in  
635 macrophages. *Immunity* 49: 842-856
- 636 Halle A, Hornung V, Petzold GC, Stewart CR, Monks BG, Reinheckel T, Fitzgerald KA, Latz E,  
637 Moore KJ, Golenbock DT (2008) The NALP3 inflammasome is involved in the innate immune  
638 response to amyloid-beta. *Nat Immunol* 9: 857-865
- 639 Hardison SE, Brown GD (2012) C-type lectin receptors orchestrate antifungal immunity. *Nat*  
640 *Immunol* 13: 817-822
- 641 Hottz ED, Lopes JF, Freitas C, Valls-de-Souza R, Oliveira MF, Bozza MT, Da PA, Weyrich AS,  
642 Zimmerman GA, Bozza FA, Bozza PT (2013) Platelets mediate increased endothelium  
643 permeability in dengue through NLRP3-inflammasome activation. *Blood* 122: 3405-3414
- 644 Humphries F, Bergin R, Jackson R, Delagic N, Wang B, Yang S, Dubois AV, Ingram RJ, Moynagh  
645 PN (2018) The E3 ubiquitin ligase Pellino2 mediates priming of the NLRP3 inflammasome. *Nat*  
646 *Commun* 9: 1560
- 647 Ishikawa H, Barber GN (2008) STING is an endoplasmic reticulum adaptor that facilitates innate  
648 immune signalling. *Nature* 455: 674-678
- 649 Ishikawa H, Ma Z, Barber GN (2009) STING regulates intracellular DNA-mediated, type I  
650 interferon-dependent innate immunity. *Nature* 461: 788-792
- 651 Johnson KE, Chikoti L, Chandran B (2013) Herpes simplex virus 1 infection induces activation and

- 652 subsequent inhibition of the IFI16 and NLRP3 inflammasomes. *J Virol* 87: 5005-5018
- 653 Juliana C, Fernandes-Alnemri T, Kang S, Farias A, Qin F, Alnemri ES (2012) Non-transcriptional  
654 priming and deubiquitination regulate NLRP3 inflammasome activation. *J Biol Chem* 287:  
655 36617-36622
- 656 Kanneganti TD, Body-Malapel M, Amer A, Park JH, Whitfield J, Franchi L, Taraporewala ZF,  
657 Miller D, Patton JT, Inohara N, Nunez G (2006) Critical role for Cryopyrin/Nalp3 in activation  
658 of caspase-1 in response to viral infection and double-stranded RNA. *J Biol Chem* 281:  
659 36560-36568
- 660 Komune N, Ichinohe T, Ito M, Yanagi Y (2011) Measles virus V protein inhibits NLRP3  
661 inflammasome-mediated interleukin-1beta secretion. *J Virol* 85: 13019-13026
- 662 Lawrence TM, Hudacek AW, de Zoete MR, Flavell RA, Schnell MJ (2013) Rabies virus is  
663 recognized by the NLRP3 inflammasome and activates interleukin-1beta release in murine  
664 dendritic cells. *J Virol* 87: 5848-5857
- 665 Martinon F, Agostini L, Meylan E, Tschopp J (2004) Identification of bacterial muramyl dipeptide as  
666 activator of the NALP3/cryopyrin inflammasome. *Curr Biol* 14: 1929-1934
- 667 Martinon F, Mayor A, Tschopp J (2009) The inflammasomes: guardians of the body. *Annu Rev*  
668 *Immunol* 27: 229-265
- 669 Martinon F, Petrilli V, Mayor A, Tardivel A, Tschopp J (2006) Gout-associated uric acid crystals  
670 activate the NALP3 inflammasome. *Nature* 440: 237-241
- 671 Maruzuru Y, Ichinohe T, Sato R, Miyake K, Okano T, Suzuki T, Koshiba T, Koyanagi N, Tsuda S,  
672 Watanabe M, Ariei J, Kato A, Kawaguchi Y (2018) Herpes simplex virus 1 VP22 inhibits  
673 AIM2-dependent inflammasome activation to enable efficient viral replication. *Cell Host*



- 674 *Microbe* 23: 254-265
- 675 Muruve DA, Petrilli V, Zaiss AK, White LR, Clark SA, Ross PJ, Parks RJ, Tschopp J (2008) The  
676 inflammasome recognizes cytosolic microbial and host DNA and triggers an innate immune  
677 response. *Nature* 452: 103-107
- 678 Negash AA, Ramos HJ, Crochet N, Lau DT, Doehle B, Papic N, Delker DA, Jo J, Bertoletti A,  
679 Hagedorn CH, Gale MJ (2013) IL-1beta production through the NLRP3 inflammasome by  
680 hepatic macrophages links hepatitis C virus infection with liver inflammation and disease. *PLoS*  
681 *Pathog* 9: e1003330
- 682 Py BF, Kim MS, Vakifahmetoglu-Norberg H, Yuan J (2013) Deubiquitination of NLRP3 by BRCC3  
683 critically regulates inflammasome activity. *Mol Cell* 49: 331-338
- 684 Rajan JV, Rodriguez D, Miao EA, Aderem A (2011) The NLRP3 inflammasome detects  
685 encephalomyocarditis virus and vesicular stomatitis virus infection. *J Virol* 85: 4167-4172
- 686 Ramos HJ, Lanteri MC, Blahnik G, Negash A, Suthar MS, Brassil MM, Sodhi K, Treuting PM,  
687 Busch MP, Norris PJ, Gale MJ (2012) IL-1beta signaling promotes CNS-intrinsic immune  
688 control of West Nile virus infection. *PLoS Pathog* 8: e1003039
- 689 Roizman, B., Knipe, D.M., and Whitley, R.J. (2013) Herpes simplex viruses. In *Fields Virology*.  
690 Knipe, D. M. (ed) pp 1823–1897. Lippincott-Williams &Wilkins Press.
- 691 Schroder K, Tschopp J (2010) The inflammasomes. *Cell* 140: 821-832
- 692 Schroder K, Zhou R, Tschopp J (2010) The NLRP3 inflammasome: a sensor for metabolic danger?  
693 *Science* 327: 296-300
- 694 Shenoy AR, Wellington DA, Kumar P, Kassa H, Booth CJ, Cresswell P, MacMicking JD (2012)  
695 GBP5 promotes NLRP3 inflammasome assembly and immunity in mammals. *Science* 336:

- 696 481-485
- 697 Song H, Liu B, Huai W, Yu Z, Wang W, Zhao J, Han L, Jiang G, Zhang L, Gao C, Zhao W (2016)
- 698 The E3 ubiquitin ligase TRIM31 attenuates NLRP3 inflammasome activation by promoting
- 699 proteasomal degradation of NLRP3. *Nat Commun* 7: 13727
- 700 Song N, Li T (2018) Regulation of NLRP3 Inflammasome by Phosphorylation. *Front Immunol* 9:
- 701 2305
- 702 Subramanian N, Natarajan K, Clatworthy MR, Wang Z, Germain RN (2013) The adaptor MAVS
- 703 promotes NLRP3 mitochondrial localization and inflammasome activation. *Cell* 153: 348-361
- 704 Swanson KV, Junkins RD, Kurkjian CJ, Holley-Guthrie E, Pendse AA, El MR, Petrucelli A, Barber
- 705 GN, Benedict CA, Ting JP (2017) A noncanonical function of cGAMP in inflammasome
- 706 priming and activation. *J Exp Med* 214: 3611-3626
- 707 Takeuchi O, Akira S (2010) Pattern recognition receptors and inflammation. *Cell* 140: 805-820
- 708 Ting JP, Lovering RC, Alnemri ES, Bertin J, Boss JM, Davis BK, Flavell RA, Girardin SE, Godzik
- 709 A, Harton JA, Hoffman HM, Hugot JP, Inohara N, Mackenzie A, Maltais LJ, Nunez G, Ogura
- 710 Y, Otten LA, Philpott D, Reed JC et al (2008) The NLR gene family: a standard nomenclature.
- 711 *Immunity* 28: 285-287
- 712 Wang H, Lei X, Xiao X, Yang C, Lu W, Huang Z, Leng Q, Jin Q, He B, Meng G, Wang J (2015)
- 713 Reciprocal Regulation between Enterovirus 71 and the NLRP3 Inflammasome. *Cell Rep* 12:
- 714 42-48
- 715 Wang W, Li G, De Wu, Luo Z, Pan P, Tian M, Wang Y, Xiao F, Li A, Wu K, Liu X, Rao L, Liu F,
- 716 Liu Y, Wu J (2018) Zika virus infection induces host inflammatory responses by facilitating
- 717 NLRP3 inflammasome assembly and interleukin-1beta secretion. *Nat Commun* 9: 106

- 718 Wang W, Xiao F, Wan P, Pan P, Zhang Y, Liu F, Wu K, Liu Y, Wu J (2017) EV71 3D Protein binds  
719 with NLRP3 and enhances the assembly of inflammasome complex. *PLoS Pathog* 13:  
720 e1006123
- 721 Webster SJ, Brode S, Ellis L, Fitzmaurice TJ, Elder MJ, Gekara NO, Tourlomousis P, Bryant C,  
722 Clare S, Chee R, Gaston H, Goodall JC (2017) Detection of a microbial metabolite by STING  
723 regulates inflammasome activation in response to *Chlamydia trachomatis* infection. *PLoS*  
724 *Pathog* 13: e1006383
- 725 Wu J, Sun L, Chen X, Du F, Shi H, Chen C, Chen ZJ (2013) Cyclic GMP-AMP is an endogenous  
726 second messenger in innate immune signaling by cytosolic DNA. *Science* 339: 826-830
- 727 Yan Y, Jiang W, Liu L, Wang X, Ding C, Tian Z, Zhou R (2015) Dopamine controls systemic  
728 inflammation through inhibition of NLRP3 inflammasome. *Cell* 160: 62-73
- 729 Ye Z, Ting JP (2008) NLR, the nucleotide-binding domain leucine-rich repeat containing gene  
730 family. *Curr Opin Immunol* 20: 3-9
- 731 Yoneyama M, Kikuchi M, Natsukawa T, Shinobu N, Imaizumi T, Miyagishi M, Taira K, Akira S,  
732 Fujita T (2004) The RNA helicase RIG-I has an essential function in double-stranded  
733 RNA-induced innate antiviral responses. *Nat Immunol* 5: 730-737
- 734
- 735
- 736

737 **Figure Legends**

738

739 **Figure 1 – STING interacts with NLRP3 to facilitate the inflammasome activation.**

740 **A–C** HEK293T cells were co-transfected with pFlag-STING and pHA-NLRP3 (A and B), or with  
741 pFlag-STING, pHA-NLRP3, pHA-ASC, and pHA-Casp-1 (C).

742 **D** Diagrams of NLRP3, PYRIN, NACHT, and LRR.

743 **E, F** HEK293T cells were co-transfected with pHA-STING and pFlag-NLRP3, pFlag-PYRIN,  
744 pFlag-NACHT, or pFlag-LRR (E), or with pFlag-STING and pHA-NLRP3, pHA-PYRIN,  
745 pHA-NACHT, or pHA-LRR (F).

746 **G** Diagrams of STING and its truncated proteins.

747 **H** HEK293T cells were co-transfected with pHA-NLRP3 and pFlag-STING or truncated proteins.

748 **I** HEK293T cells were co-transfected with plasmids encoding NLRP3, ASC, pro-Casp-1, and  
749 pro-IL-1 $\beta$  to generate a pro-IL-1 $\beta$  cleavage system (NACI), and transfected with pFlag-STING or  
750 truncated proteins. IL-1 $\beta$  in supernatants was determined by ELISA.

751 **J** HEK293T cells were co-transfected with pFlag-ASC, pHA-NLRP3, or pFlag-STING.

752 **A–C, E, F, H** and **J** Cell lysates were subjected to co-immunoprecipitation (Co-IP) using IgG  
753 (Mouse) and anti-Flag antibody (A, F), IgG (Rabbit) and anti-HA antibody (B, J), anti-HA antibody  
754 (C), and anti-Flag antibody (E, H), and analyzed by immunoblotting using anti-HA or anti-Flag  
755 antibody (top) or subjected directly to Western blot using anti-Flag or anti-HA antibody (input)  
756 (bottom).

757 **K** HEK293T cells were co-transfected with pFlag-ASC, pHA-NLRP3, and pMyc-STING. Pellets  
758 were subjected to ASC oligomerization assays (top) and lysates were prepared for Western blots

759 (bottom).

760 **L, M** HEK293T cells (L) or HeLa cells (M) were co-transfected with pFlag-STING and/or

761 pHA-NLRP3. Sub-cellular localization of Flag-STING (green), HA-NLRP3 (red), and DAPI (blue)

762 were examined by confocal microscopy.

763 Data shown are means  $\pm$  SEMs; \*\*  $p < 0.01$ , \*\*\* $p < 0.0001$ ; ns, no significance.

764

765 **Figure 2 – HSV-1 infection promotes the STING-NLRP3 interaction.**

766 **A, B** TPA-differentiated THP-1 macrophages were mock-infected or infected with HSV-1 (MOI=1)

767 for 4 h.

768 **C, D** HEK293T cells (C) and HeLa cells (D) were co-transfected with pFlag-STING and

769 pHA-NLRP3, and then infected with HSV-1 (MOI=1) for 2–4 h.

770 **E** TPA-differentiated THP-1 macrophages were transfected with HSV120 (3  $\mu$ g/ml) by Lipo2000

771 for 4 h.

772 **F, G** HEK293T cells (F) and HeLa cells (G) were co-transfected with pFlag-STING and

773 pHA-NLRP3 and then transfected with HSV120 (3  $\mu$ g/ml) for 4 h.

774 **H** Primary MEFs were primed with LPS (1  $\mu$ g/ml) for 6 h, and then infected with HSV-1 (MOI=1)

775 for 4 h or transfected with HSV120 (3  $\mu$ g/ml) for 4 h.

776 **A–H** Cell lysates were subjected to Co-IP using IgG (Mouse) or anti-NLRP3 antibody (A),

777 anti-STING antibody (B), IgG (Mouse) or anti-Flag antibody (C), anti-Flag antibody (D), IgG

778 (Mouse) or anti-NLRP3 antibody (E), IgG (Mouse) or anti-Flag antibody (F), anti-Flag antibody (G),

779 and IgG (Mouse) or anti-NLRP3 antibody (H), and then analyzed by immunoblotting using

780 anti-NLRP3 and anti-STING antibody (top) or analyzed directly by immunoblotting using

781 anti-NLRP3 and anti-STING antibody (as input) (bottom).

782

783 **Figure 3 – HSV-1 infection induces IL-1 $\beta$  expression and secretion.**

784 **A–K** TPA-differentiated THP-1 macrophages were treated with 2  $\mu$ M Nigericin for 2 h, and infected

785 with HSV-1 at MOI=0.1, 0.2, 0.4, and 0.8 for 8 h (A, C, E and G), infected with HSV-1 at MOI=0.8

786 for 2, 4, 6, and 8 h (B, D, F and H), or transfected with HSV120 (3  $\mu$ g/ml) for 2, 4, and 6 h (I–K).

787 **L–O** Mice primary MEFs were primed with LPS (1  $\mu$ g/ml) for 6 h, and then treated with 5 mM ATP

788 for 2 h or infected with HSV-1 (MOI=1) (L and N) or transfected with HSV120 (3  $\mu$ g/ml) (M, O)

789 for 2, 4, and 6 h.

790 **A, B, I, L** and **M** IL-1 $\beta$  protein was determined by ELISA.

791 **C, D** and **J** Matured IL-1 $\beta$  (p17) and cleaved Casp-1 in supernatants (top) and pro-IL-1 $\beta$  production

792 in lysates (bottom) were determined by Western-blot analyses.

793 **E, F, G, H, K, N** and **O** IL-1 $\beta$  mRNA and GAPDH mRNA (E, F), HSV-1 ICP27 mRNA and

794 GAPDH mRNA (G, H and N), and IFN- $\beta$  mRNA and GAPDH mRNA (K, O) were quantified by

795 RT-PCR.

796 Data shown are means  $\pm$  SEMs; \* $p$  < 0.05, \*\*  $p$  < 0.01, \*\*\* $p$  < 0.0001; ns, no significance.

797

798 **Figure 4 – The NLRP3 inflammasome is required for HSV-1-induced IL-1 $\beta$  activation.**

799 **A–F** TPA-differentiated THP-1 macrophages were treated with 2  $\mu$ M Nigericin for 2 h, infected

800 with HSV-1 at MOI=0.8 for 8 h, and then treated with Glybenclamide (25  $\mu$ g/ml) (A, B and E) or

801 Ac-YVAD-cmk (10  $\mu$ g/ml) (C, D and F).

802 **G–K** THP-1 cells stably expressing shRNAs targeting NLRP3, ASC or Casp-1 were generated and

803 then treated with 2  $\mu$ M Nigericin for 2 h (G, H) or infected with HSV-1 at MOI=0.8 for 8 h (I–K).  
804 L–N Primary MEFs of C57BL/6 WT mice and C57BL/6 NLRP3<sup>-/-</sup> mice were primed with LPS (1  
805  $\mu$ g/ml) for 6 h, and then treated with 5 mM ATP for 2 h or infected with HSV-1 (MOI=1) for 6 h.  
806 NLRP3 and GAPDH protein in lysates were determined by Western blot (L). IL-1 $\beta$  levels were  
807 determined by ELISA (A, C, G and M). Matured IL-1 $\beta$  (p17) and cleaved Casp-1 (p22/p20) in  
808 supernatants (top) or pro-IL-1 $\beta$  and pro-Casp-1 in lysates (bottom) were determined by Western-blot  
809 (B, H and J). HSV-1 ICP27 mRNA and GAPDH mRNA were quantified by RT-PCR (E, F, K and N).  
810 Data shown are means  $\pm$  SEMs; \*\*\*p < 0.0001; ns, no significance.

811

812 **Figure 5 – STING recruits NLRP3 to the ER and promotes the inflammasome formation.**

813 A–D HeLa cells were co-transfected with pFlag-STING and pHA-NLRP3 (A), transfected with  
814 pFlag-NLRP3 and infected with HSV-1 (MOI=1) for 4 h or transfected with HSV120 (3  $\mu$ g/ml) for  
815 4 h (B, C and D). Sub-cellular localization of HA-NLRP3 (green) (A), Flag-STING (red) (A), ER  
816 Blue (blue) (A, D), Flag-NLRP3 (red) (B, C), Calnexin (green) (B), DAPI (blue) (B and C),  
817 Calnexin (green) (C) and HA-NLRP3 (red) (D) were examined by confocal microscopy.

818 E–G HeLa cells were co-transfected with pFlag-STING and pHA-NLRP3 (E). THP-1 macrophages  
819 were infected with HSV-1 (MOI=1) for 4 h (F). Mice primary MEFs were primed with LPS (1  
820  $\mu$ g/ml) for 6 h and infected with HSV-1 (MOI=1) for 4 h (G). Flag-NLRP3, HA-STING, Calnexin,  
821 and GAPDH in whole cell lysate (WCL) and purified ER were determined by Western-blot  
822 analyses.

823 H, I HeLa cells stably expressing sh-STNG were transfected with pFlag-NLRP3 and infected with  
824 HSV-1 (MOI=1) for 4 h or transfected with HSV120 (3  $\mu$ g/ml) for 4 h. Sub-cellular localization of

825 Flag-NLRP3 (red) (H), Calnexin (green) (H), DAPI (blue) (H), HA-NLRP3 (red) (I) and ER blue (I)  
826 were examined by confocal microscopy.

827 **J–L** HeLa cells stably expressing sh-STING were transfected with pHA-NLRP3 and infected with  
828 HSV-1 (MOI=1) for 4 h (J). THP-1 cells stably expressing sh-STING were differentiated to  
829 macrophages, and infected with HSV-1 (MOI=1) for 4 h (K). Primary MEFs stably expressing  
830 sh-STING were primed with LPS (1 µg/ml) for 6 h, and infected with HSV-1 (MOI=1) for 4 h (L).  
831 HA-NLRP3 (J), NLRP3 (K, I), STING (J–L), Calnexin (ER) (J–L), and GAPDH (J–L) in WCL and  
832 purified ER fraction were determined by Western-blot analyses.

833

834 **Figure 6 – STING deubiquitinates NLRP3 to activate the NLRP3 inflammasome.**

835 **A–E** HeLa cells were co-transfected with pFlag-NLRP3, pHA-Ubiquitin, and pMyc-STING (A),  
836 with pFlag-NLRP3, pHA-Ubiquitin, pHA-Ubiquitin mutations (K48R), pHA-Ubiquitin mutations  
837 (K63R) and pMyc-STING (B), with pFlag-NLRP3, pHA-Ubiquitin, pHA-Ubiquitin  
838 mutations(K48O), pHA-Ubiquitin mutations(K63O), and pMyc-STING (C), with pFlag-NLRP3 and  
839 pHA-Ubiquitin and then infected with HSV-1(MOI=1) for 2 and 4 h (D), and transfected with  
840 HSV120 (3 µg/ml) for 2 and 4 h (E). Cell lysates were prepared and subjected to denature-IP using  
841 anti-Flag antibody and then analyzed by immunoblotting using an anti-HA or anti-Flag antibody  
842 (top) or subjected directly to Western blot using an anti-Flag, anti-HA or anti-Myc antibody (as  
843 input) (bottom).

844 **F–I** TPA-differentiated THP-1 macrophages were infected with HSV-1 (MOI=1) for 2 and 4 h (F),  
845 and transfected with HSV120 (3 µg/ml) for 2, 4 and 6 h (G). Mice primary MEFs were infected  
846 with HSV-1 (MOI=1) for 2 h (H). THP-1 cells stably expressing sh-NC or sh-STING were



847 generated and differentiated to macrophages and then infected with HSV-1 (MOI=1) for 4 h (I). Cell  
848 lysates were prepared and subjected to denature-IP using anti-NLRP3 antibody and then analyzed  
849 by immunoblotting using an anti-Ubiquitin, anti-K48-Ubiquitin, anti-K63-Ubiquitin or anti-NLRP3  
850 antibody (top) (F) or using anti-NLRP3 antibody (G, H and I), or subjected directly to Western blot  
851 using an anti- Ubiquitin or anti-NLRP3 antibody (as input) (bottom).

852

853 **Figure 7 – STING is required for the NLRP3 inflammasome activation upon DNA virus**  
854 **infection.**

855 **A–H** THP-1 cells stably expressing sh-NC or sh-STING were generated and differentiated to  
856 macrophages, and then infected with HSV-1 at MOI=0.8 for 2, 4, and 8 h (A–C), transfected with  
857 DNA90 (3 µg/ml), HSV120 (3 µg/ml) or infected with HSV-1 at MOI=0.8 for 8 h (D, E), and  
858 treated with 2 µM Nigericin for 2 h and infected with HSV-1 at MOI=0.8 for 8 h (F–H). IL-1β  
859 levels were determined by ELISA (A, D and F). Matured IL-1β (p17) and cleaved Casp-1 (p22/p20)  
860 in supernatants or STING, pro-IL-1β and pro-Casp-1 in lysates were determined by Western-blot (B,  
861 C and G). HSV-1 ICP27 mRNA and GAPDH mRNA were quantified by RT-PCR (C, H).

862 **I–M** THP-1 cells stably expressing shRNA targeting STING was generated and differentiated to  
863 macrophages, then infected with SeV (MOI=1) for 24 h, ZIKV (MOI=1) for 24 h or HSV-1  
864 (MOI=0.8) for 8 h. IL-1β levels were determined by ELISA (I). Matured IL-1β (p17) and cleaved  
865 Casp-1 (p22/p20) in supernatants or STING, pro-IL-1β and pro-Casp-1 in lysates were determined  
866 by Western-blot (J). SeV P mRNA (K), ZIKV mRNA (L), HSV-1 ICP27 mRNA (M) and GAPDH  
867 mRNA were quantified by RT-PCR.

868 Data shown are means ± SEMs; \*p < 0.05, \*\* p < 0.01, \*\*\*p < 0.0001; ns, no significance.

869

870 **Figure 8 – NLRP3 is critical for host defense against HSV-1 infection in mice.**

871 **A, B** C57BL/6 WT mice (8-week-old, female, n=9) and C57BL/6 NLRP3<sup>-/-</sup> mice (8-week-old,  
872 female, n=5) were infected i.p. with HSV-1 at  $1 \times 10^7$  pfu for 11 days. The survival rates (A) and  
873 body weights (B) of mice were evaluated.

874 **C–G** WT mice (8-week-old, female) and NLRP3<sup>-/-</sup> mice (8-week-old, female) were mock-infected  
875 i.p. with PBS (WT and NLRP3<sup>-/-</sup> mice, n=3) or infected i.p. with HSV-1 (WT mice, n=4, NLRP3<sup>-/-</sup>  
876 mice, n=3) at  $1 \times 10^7$  pfu for 6 h. IL-1 $\beta$  in mice sera was determined by ELISA (C). IL-1 $\beta$  mRNA (D),  
877 IL-6 mRNA (E), TNF- $\alpha$  mRNA (F), HSV-1 UL30 mRNA (G) and GAPDH mRNA in mice blood  
878 were quantified by RT-PCR.

879 **H–J** WT mice (8-week-old, female, n=4) and NLRP3<sup>-/-</sup> mice (8-week-old, female, n=4) were  
880 infected i.p. with HSV-1 at  $1 \times 10^7$  pfu for 1 days. IL-1 $\beta$  mRNA (H), IL-6 mRNA (I), and GAPDH  
881 mRNA in mice lung were quantified by RT-PCR. HSV-1 viral titers were measured by plaque assays  
882 for mice lung (J).

883 **K–M** WT mice (8-week-old, female, n=7) and NLRP3<sup>-/-</sup> mice (8-week-old, female, n=7) were  
884 infected i.p. with HSV-1 at  $1 \times 10^7$  pfu for 4 days. IL-1 $\beta$  mRNA (K), IL-6 mRNA (L) and GAPDH  
885 mRNA in mice brain were quantified by RT-PCR. HSV-1 viral titers were measured by plaque  
886 assays for mice brain (M).

887 **N, O** WT mice (8-week-old, female) and NLRP3<sup>-/-</sup> mice (8-week-old, female) were infected i.p.  
888 with HSV-1 at  $1 \times 10^7$  pfu for 1 day. The lung tissue (N) and brain tissue (O) were stained with  
889 histological analysis (H&E or IL-1 $\beta$ ).

890 Data shown are means  $\pm$  SEMs; \*p < 0.05, \*\* p < 0.01, \*\*\*p < 0.0001; ns, no significance.

891

892 **Fig. 9. A proposed model for the regulation of NLRP3 inflammasome activation mediated by**  
893 **the cGAS-STING-NLRP3 pathway.**

894 In resting cells and under normal physiological conditions, CUL1 interacts with NLRP3 to disrupt  
895 the inflammasome assembly, and catalyzes NLRP3 ubiquitination to repress the inflammasome  
896 activation (left). However, in response to inflammatory stimuli, CUL1 disassociates from NLRP3 to  
897 release the repression of inflammasome assembly and activation (right).

898

899

# Figure 1

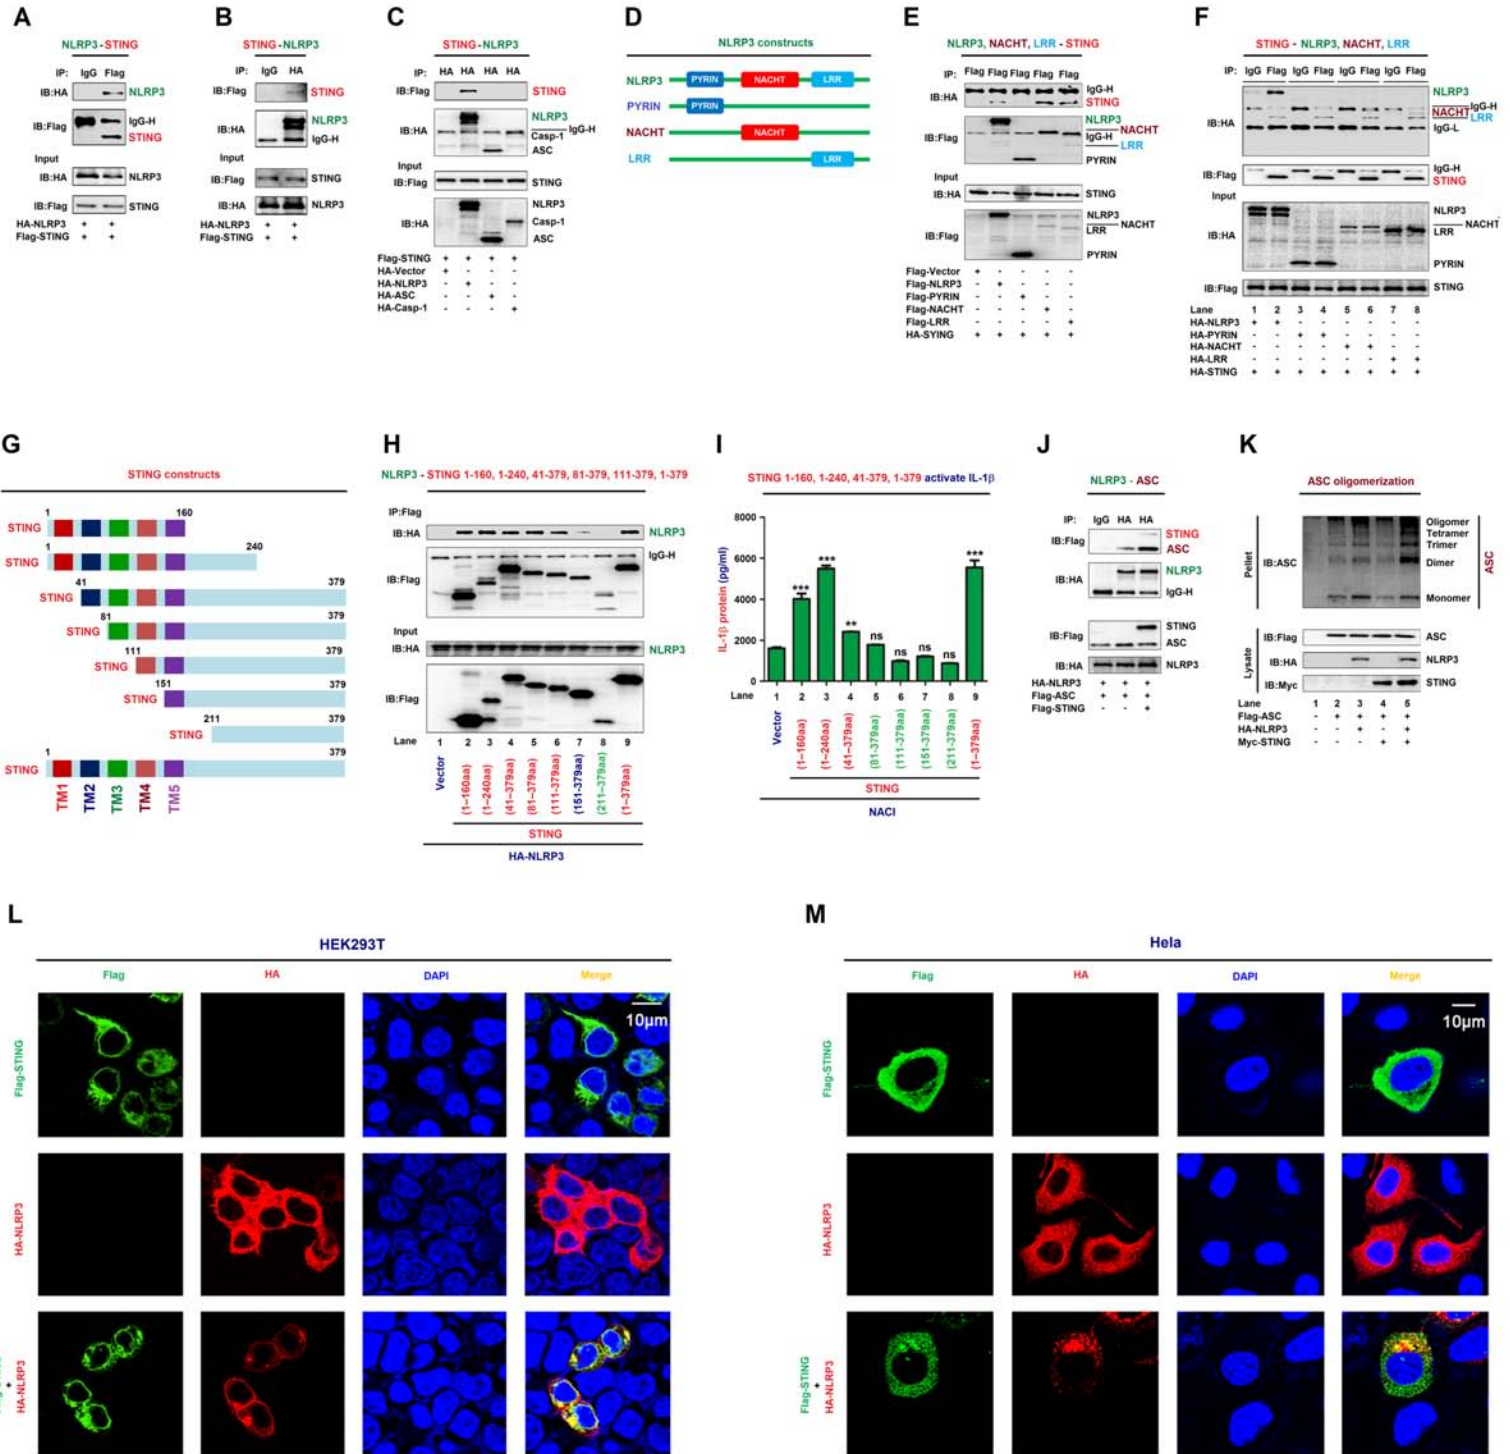

# Figure 2

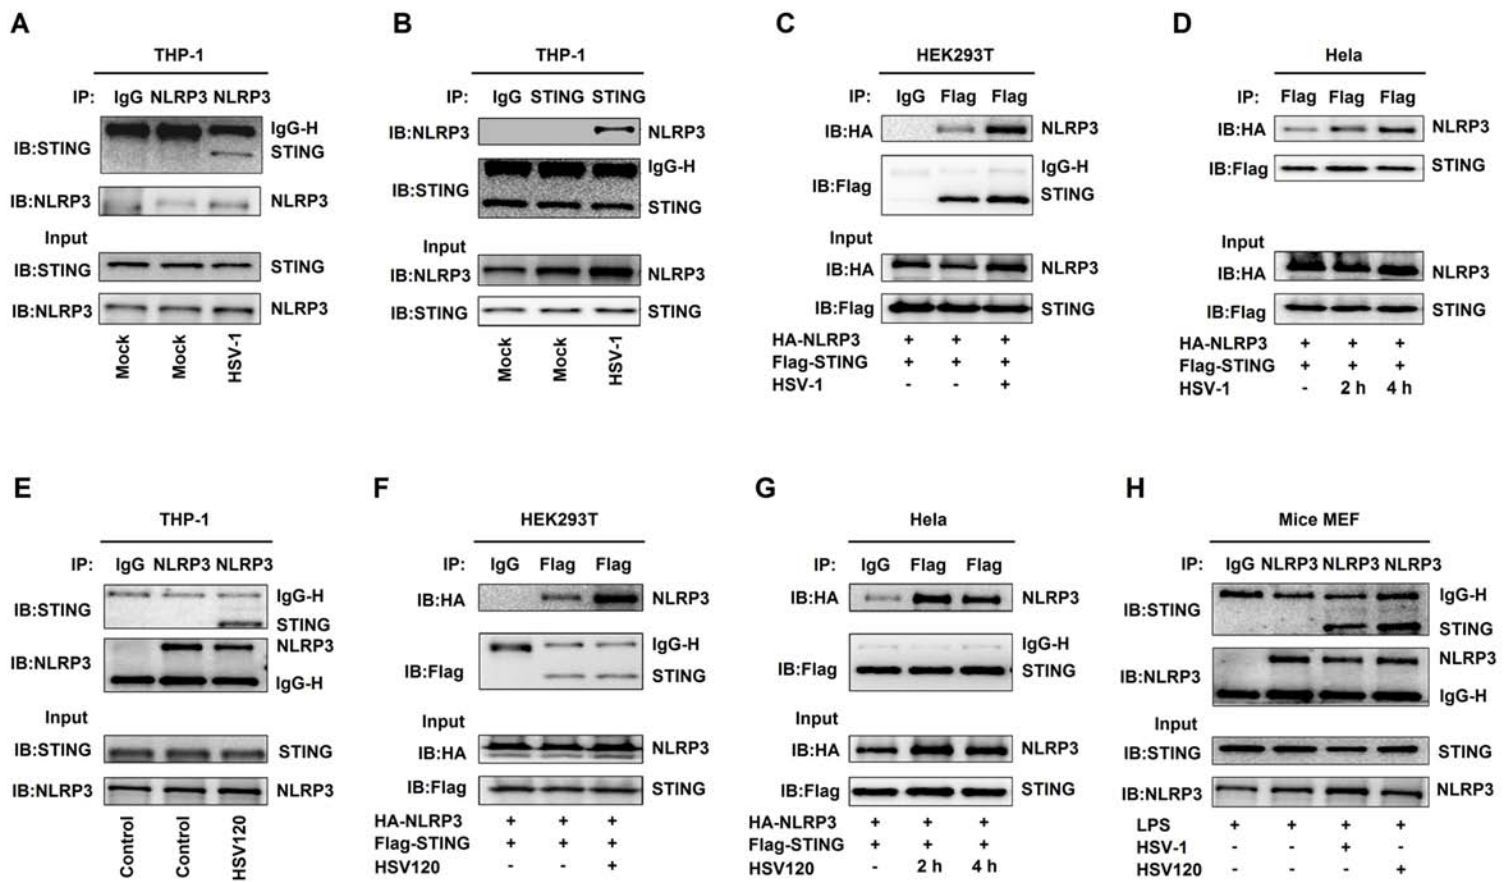

# Figure 3

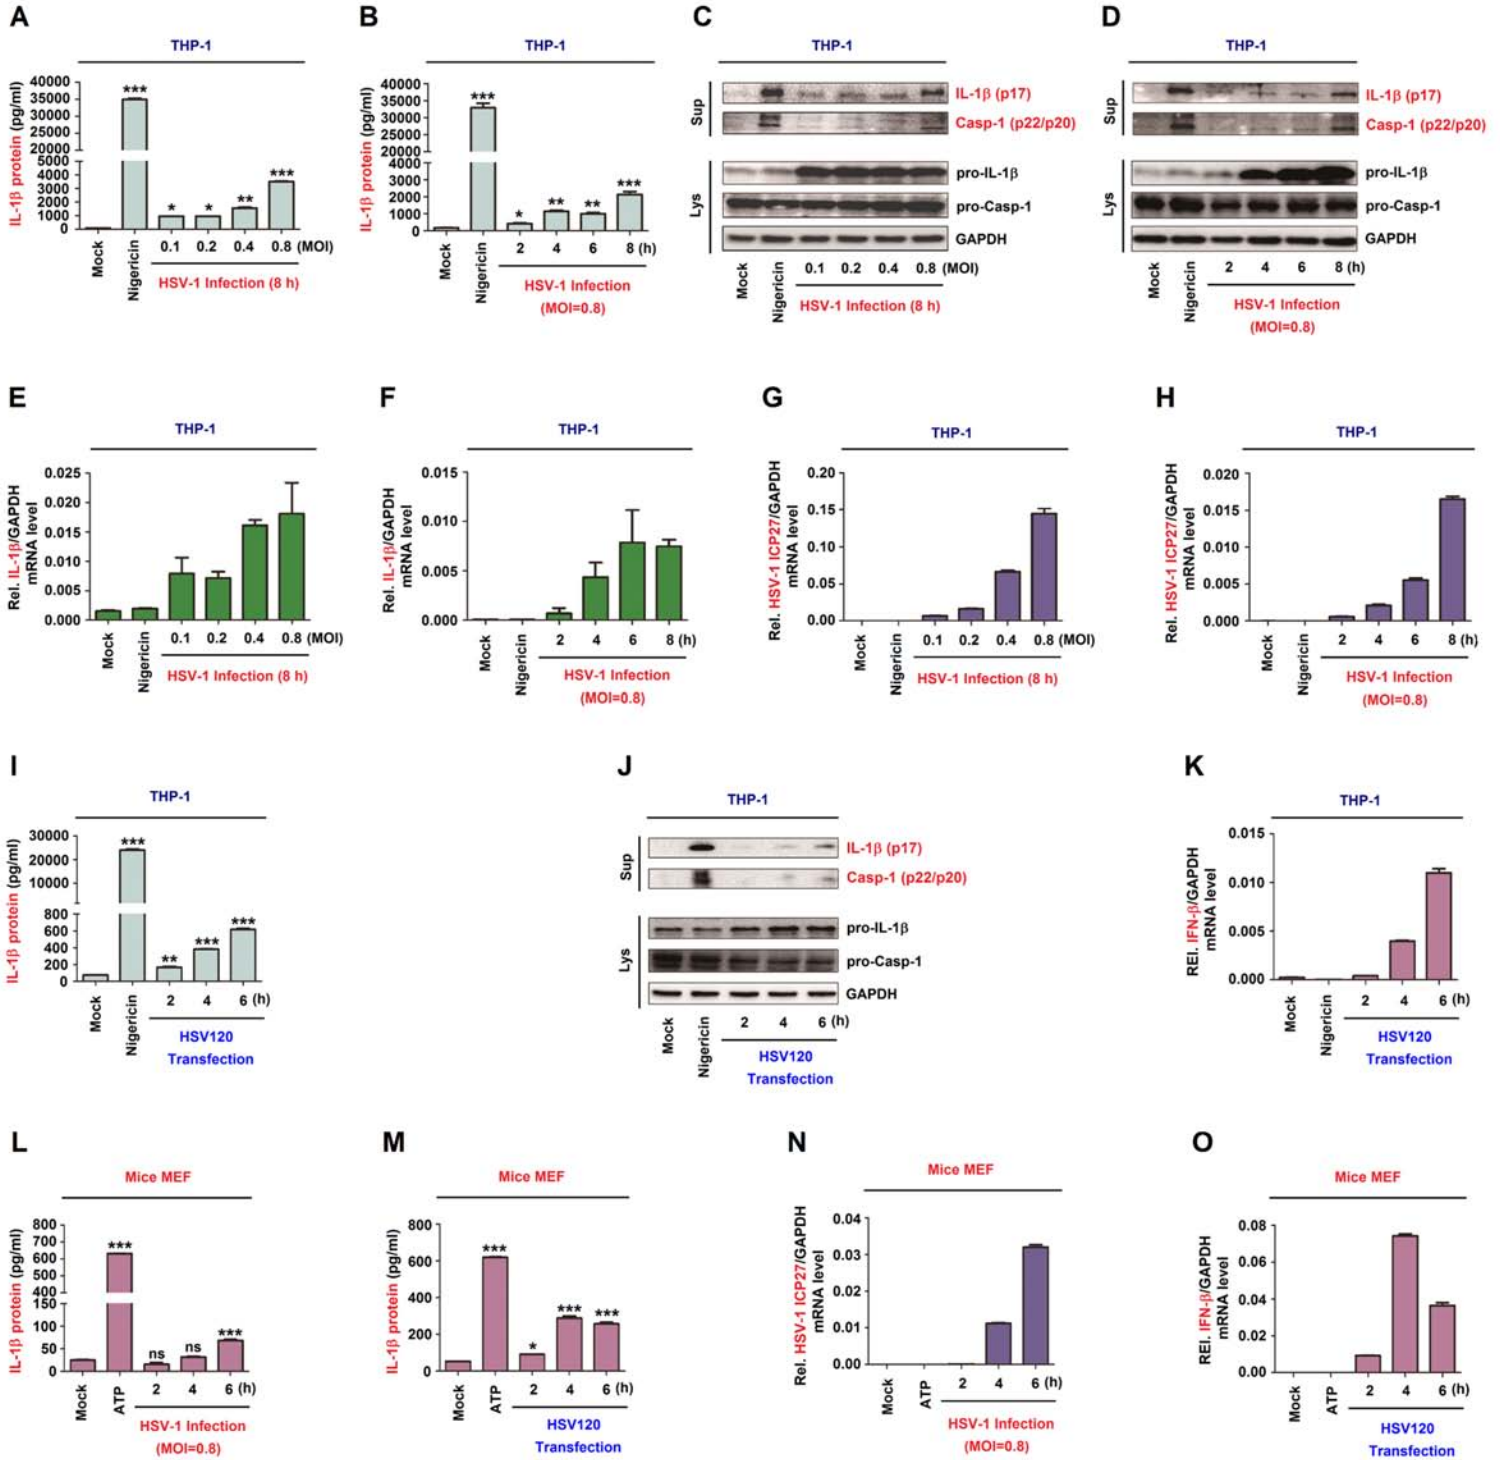

# Figure 4

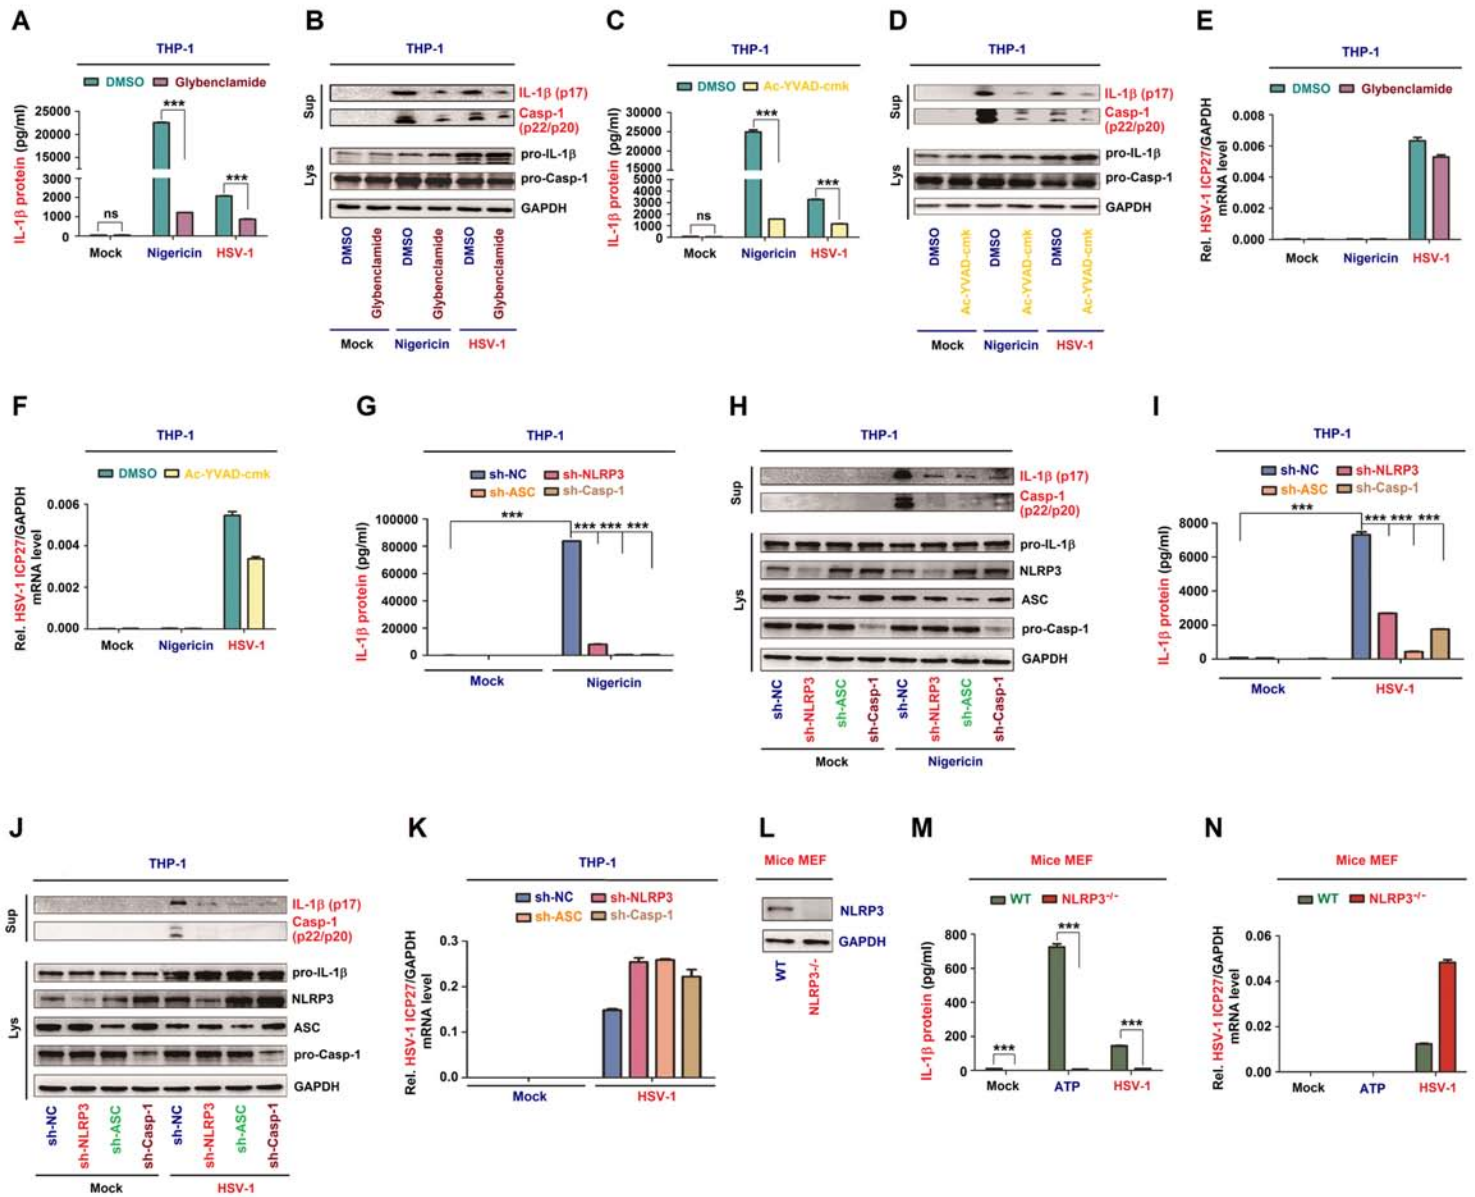

# Figure 5

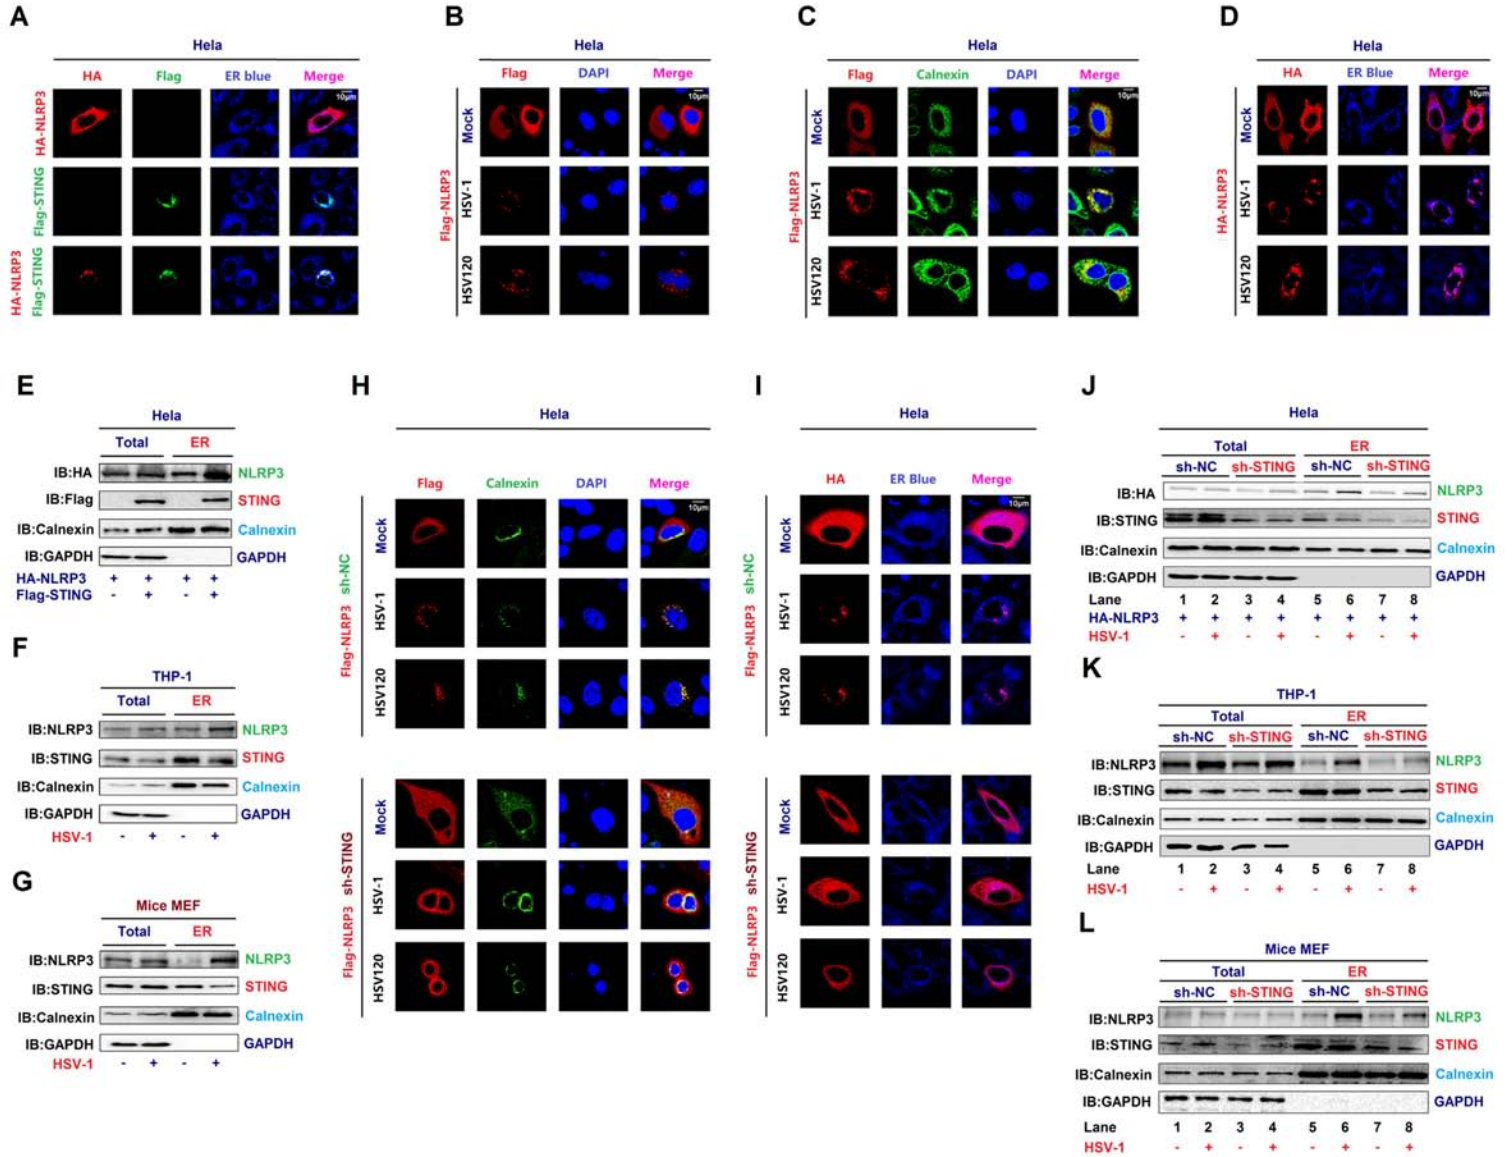



# Figure 6

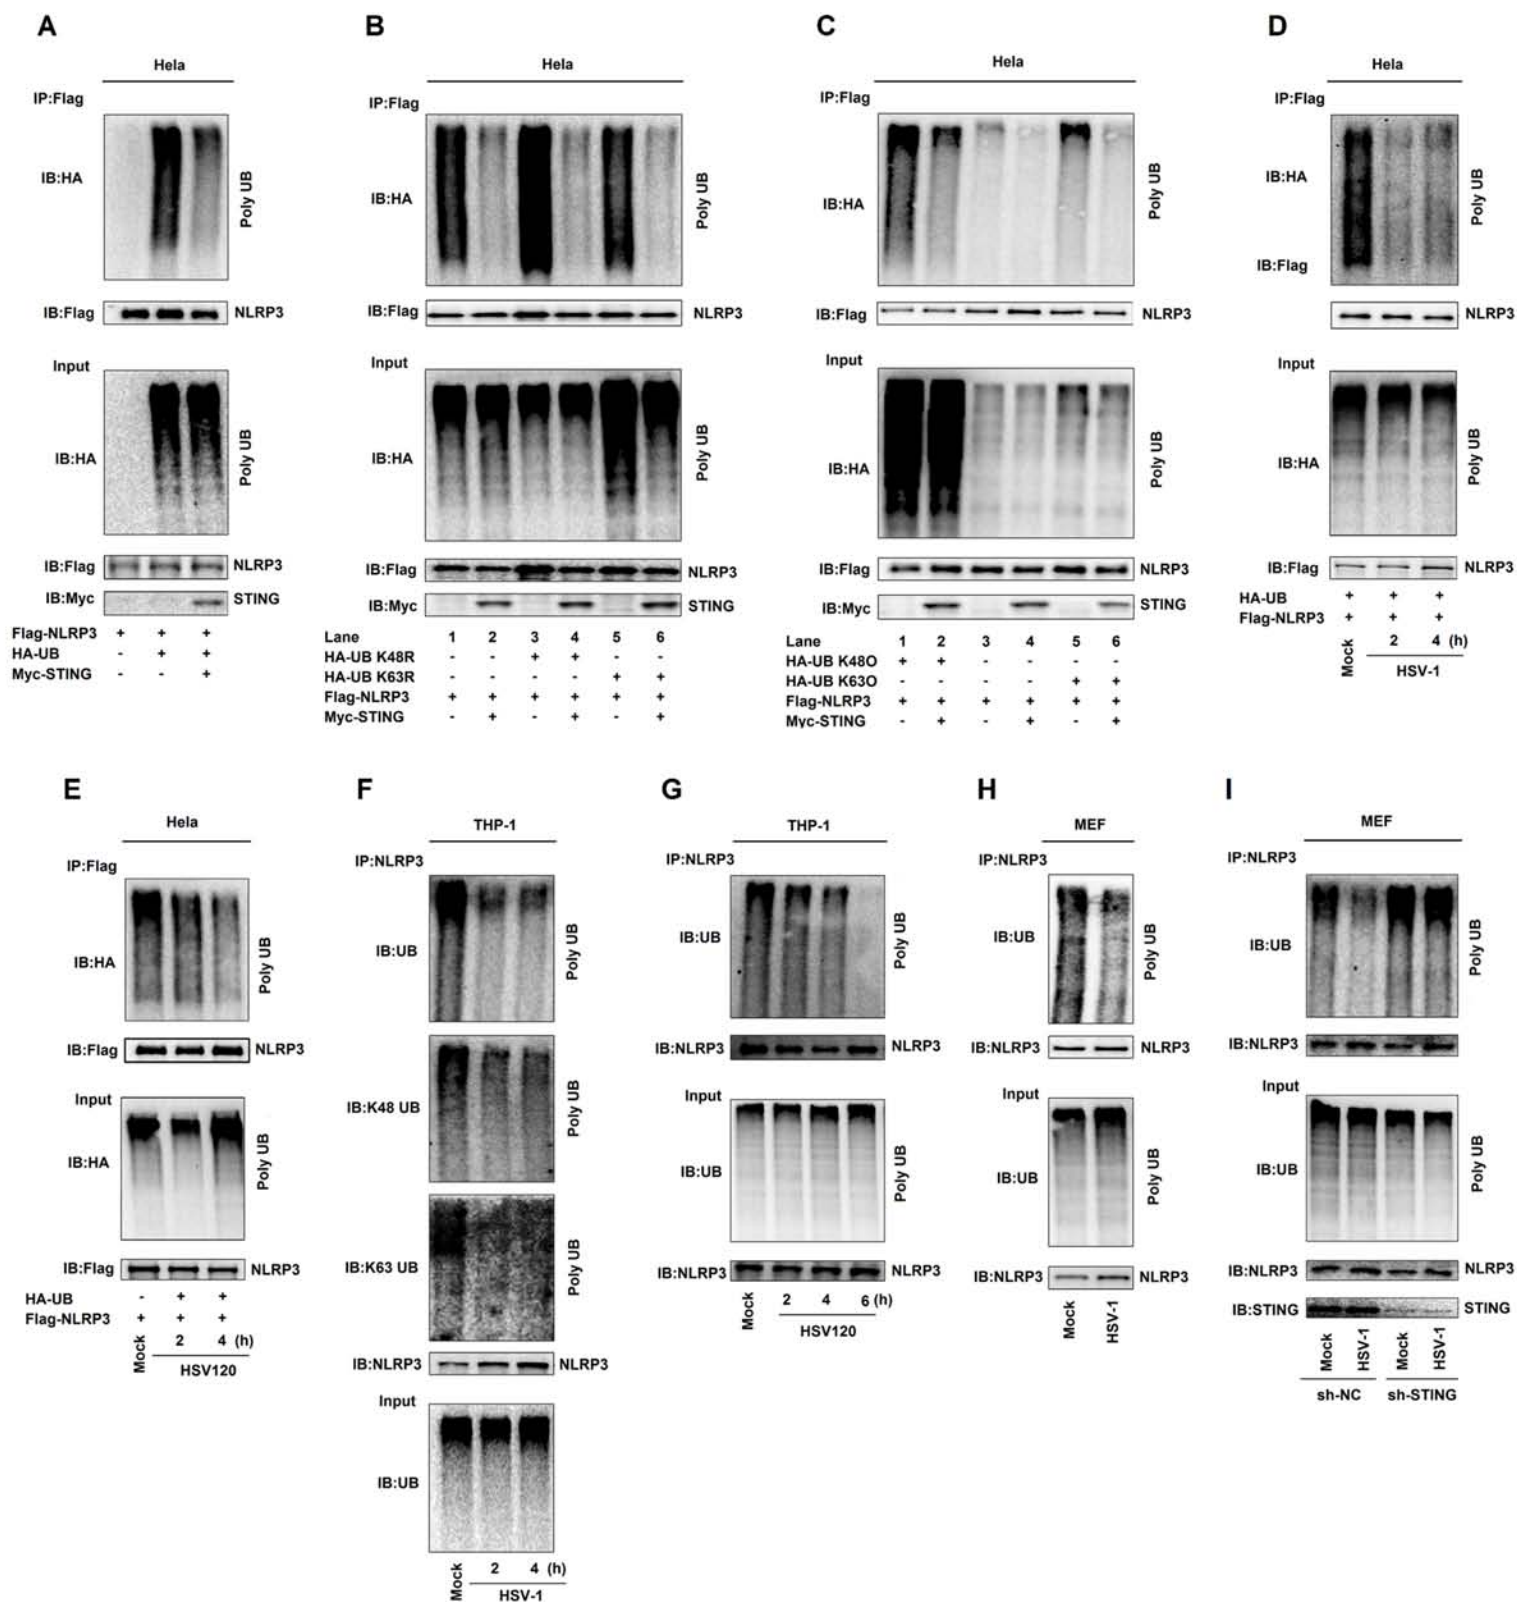

# Figure 7

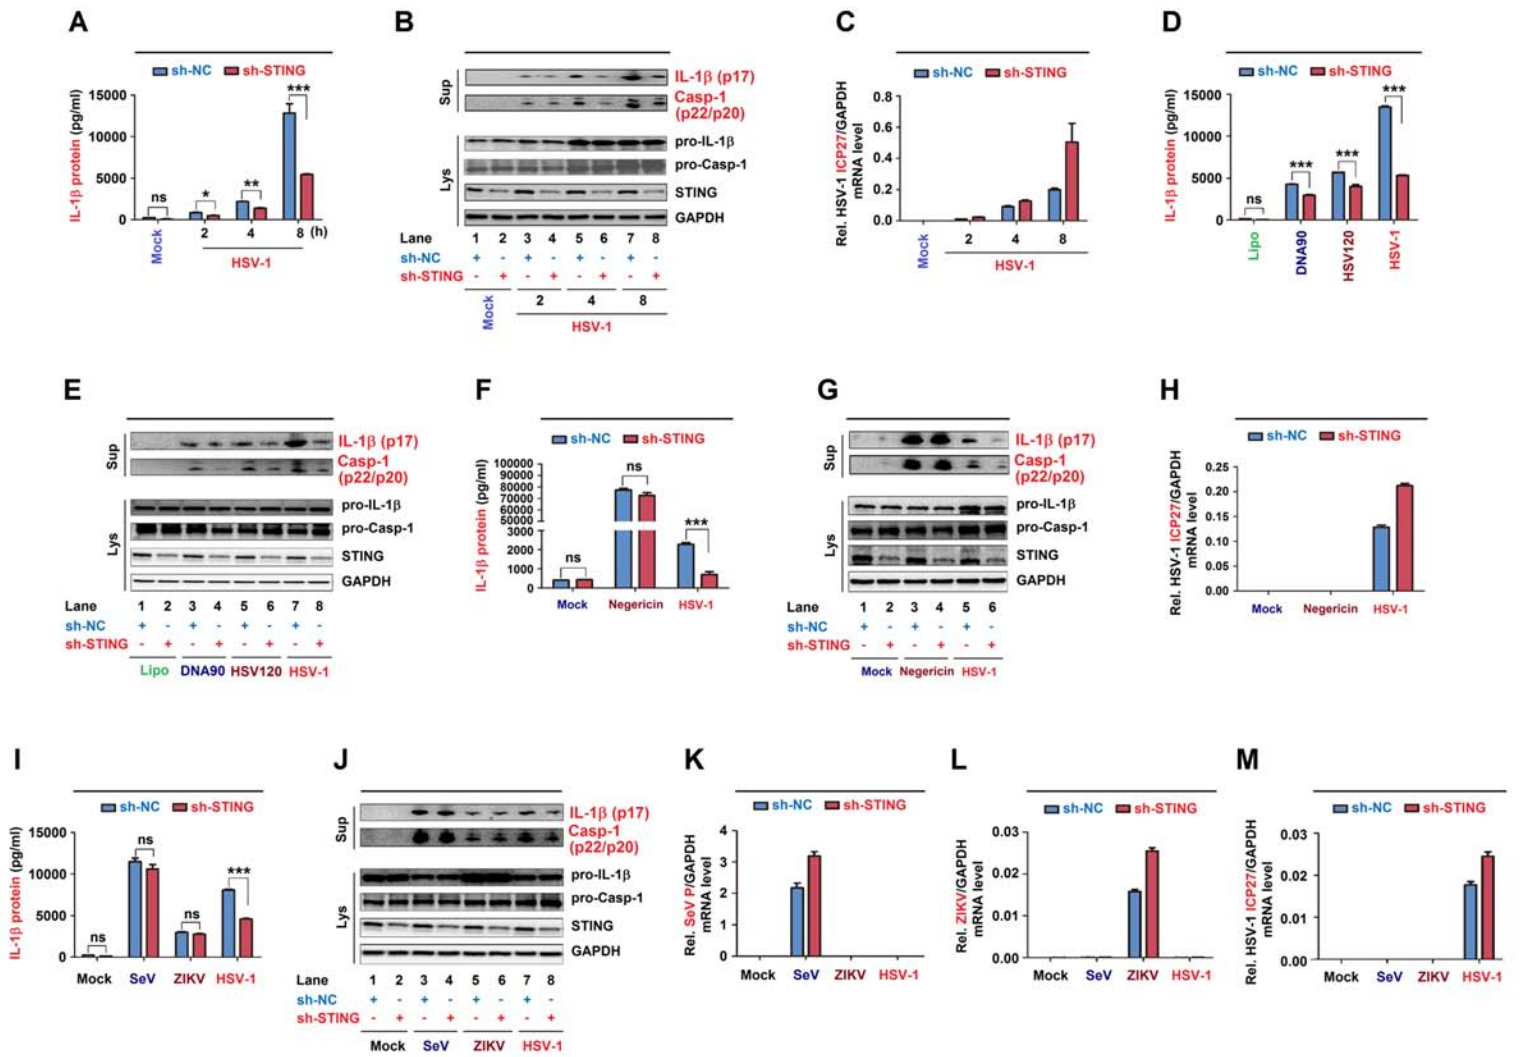

# Figure 8

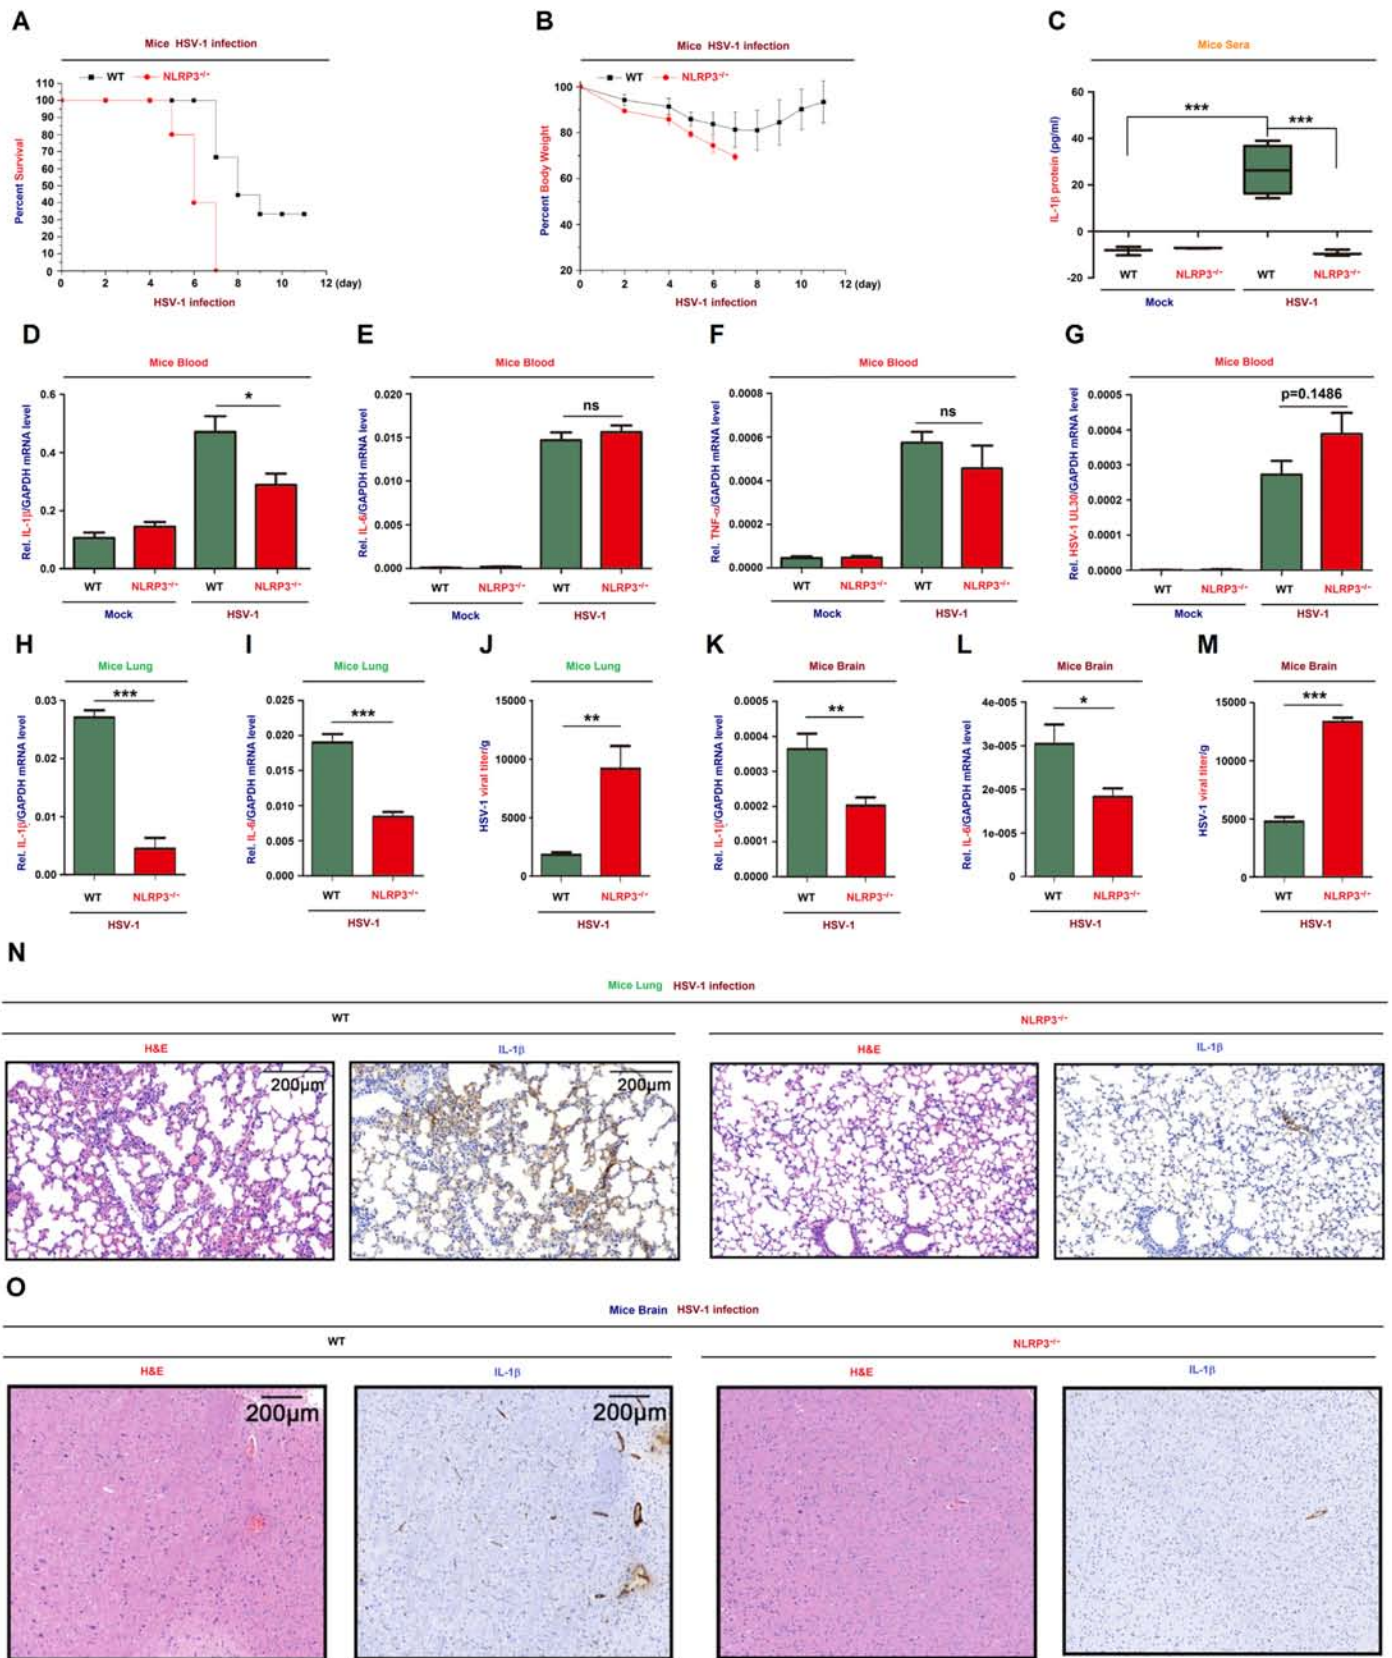

# Figure 9

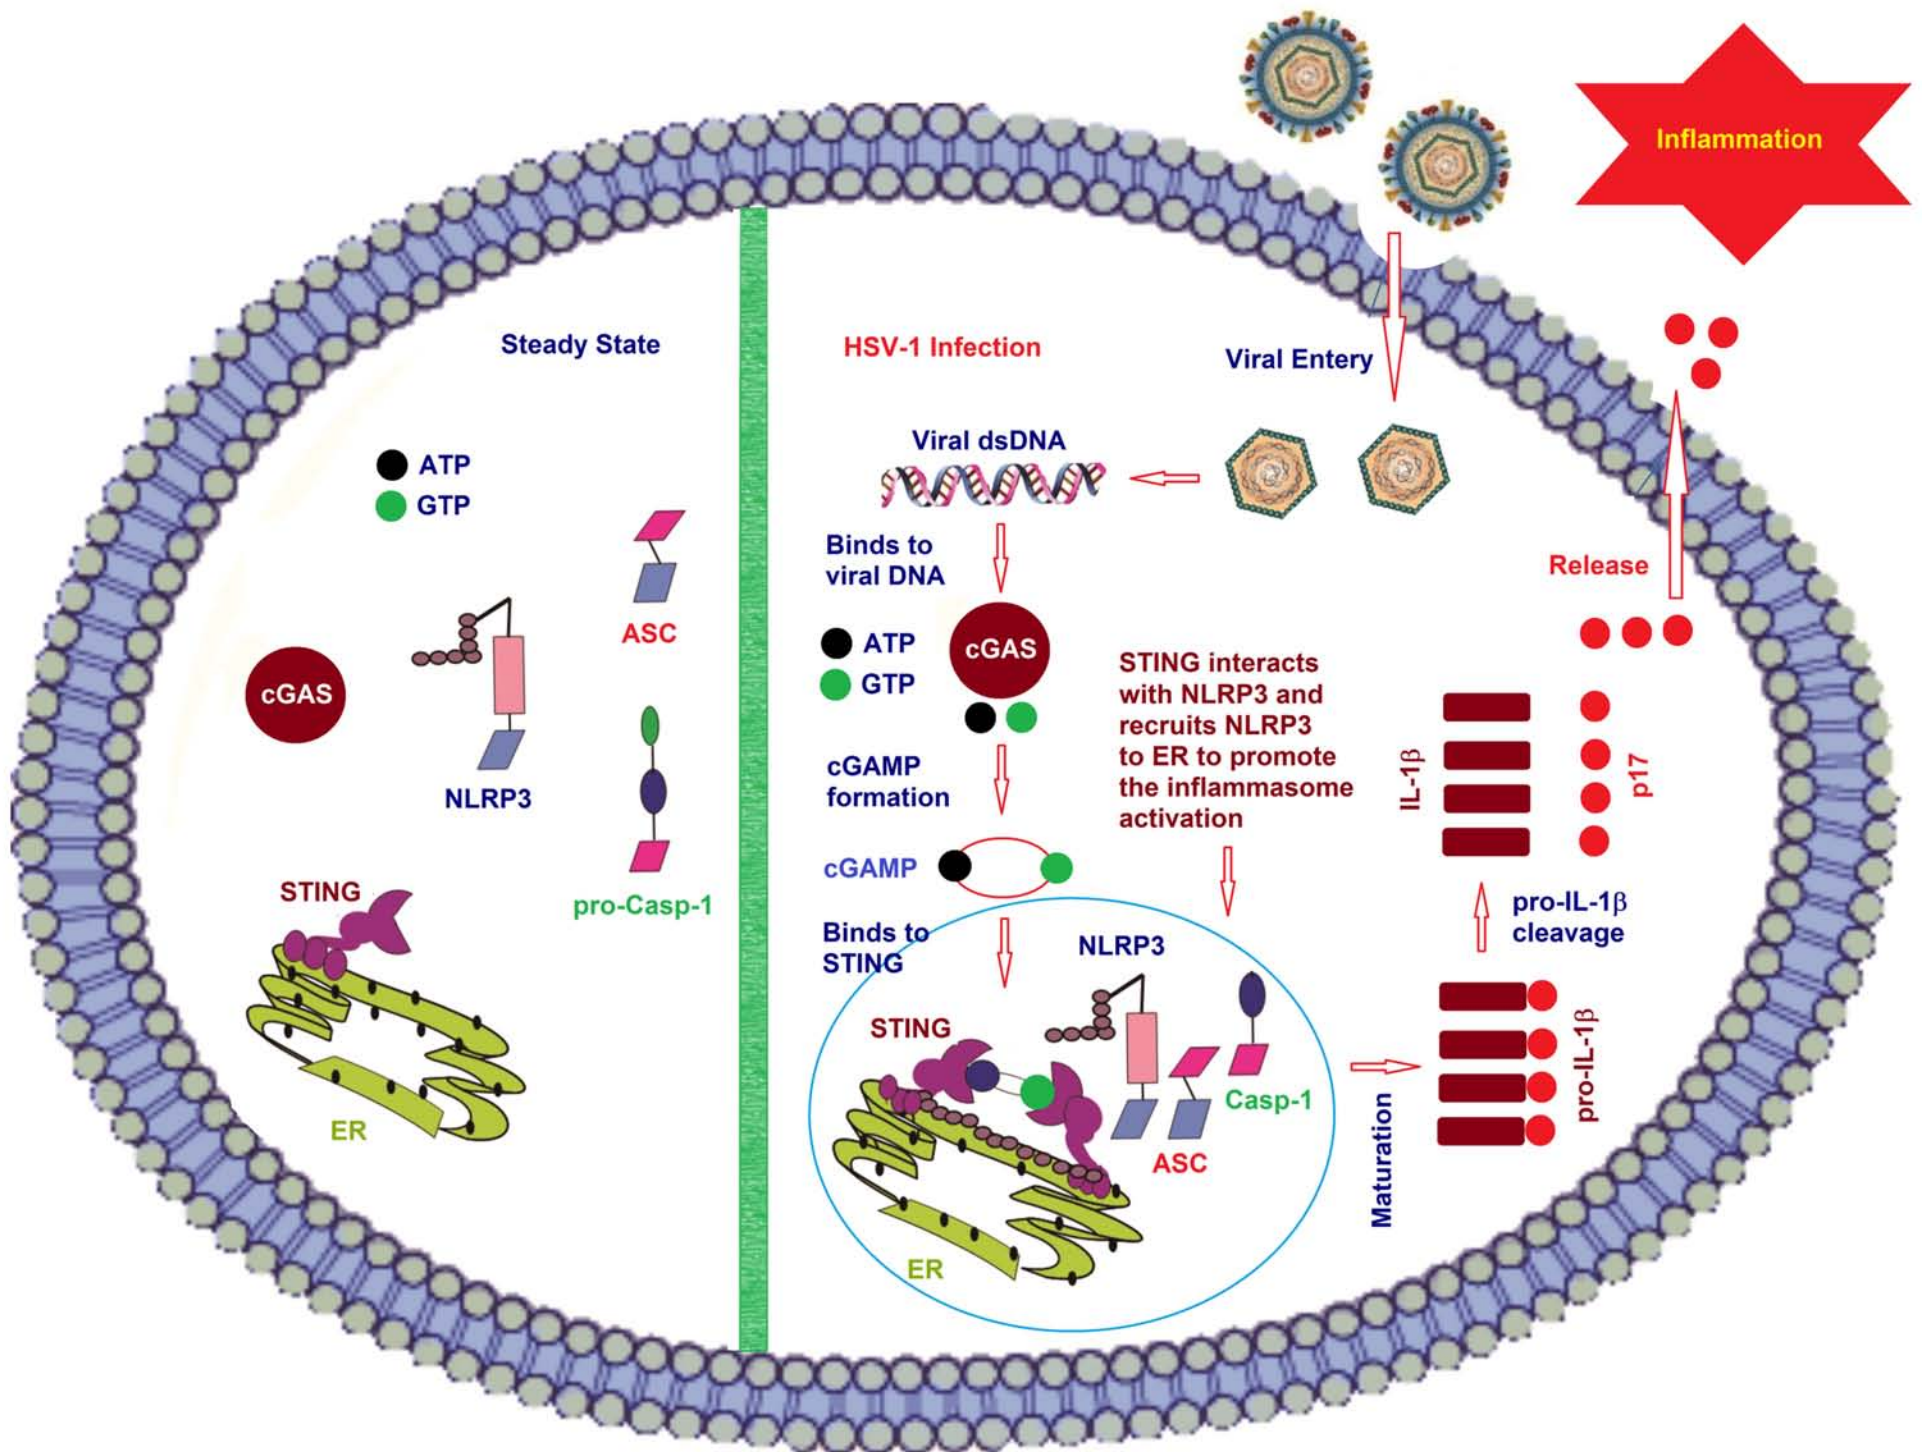

Source: https://biorxiv.org/content/biorxiv/early/2019/06/24/681338.full-text.pdf
